# Supplementary material for: Design, synthesis and fungicidal activity of isothiazole–thiazole derivatives
Source: Royal Society of Chemistry journal article supplement (doi:10.1039/c8ra07619g), 2018-01-01

## Supporting Information

### Design, Synthesis and Fungicidal Activity of Isothiazole-thiazole Derivatives

*Qi-Fan Wu<sup>a, §</sup>, Bin Zhao<sup>a, §</sup>, Zhi-Jin Fan<sup>\*, a</sup>, Jia-Bao Zhao<sup>a</sup>, Xiao-Feng Guo<sup>a</sup>, Dong-Yan Yang<sup>\*, a</sup>, Nai-Lou Zhang<sup>a</sup>, Bin Yu<sup>a</sup>, Tatiana Kalinina<sup>b</sup> and Tatiana Glukhareva<sup>b\*</sup>*

*a. State Key Laboratory of Elemento-Organic Chemistry, College of Chemistry, Nankai University, Tianjin 300071, P. R. China*

*b. The Ural Federal University Named after the First President of Russia B. N. Yeltsin, 19 Mira Str., Ekaterinburg 620002, Russia.*

\* Address correspondence to this author at State Key Laboratory of Elemento-Organic Chemistry, College of Chemistry, Nankai University, No. 94, Weijin Road, Nankai District, Tianjin 300071, P. R. China (telephone +86-23499464; Fax:+86 022-23503620; e-mail: [fanzj@nankai.edu.cn](mailto:fanzj@nankai.edu.cn); [yangdy@nankai.edu.cn](mailto:yangdy@nankai.edu.cn)) and Tatiana Glukhareva at The Ural Federal University Named after the First President of Russia B. N. Yeltsin, 19 Mira Str., Ekaterinburg 620002, Russia(e-mail: [taniagluhareva@yandex.ru](mailto:taniagluhareva@yandex.ru)).

<sup>§</sup>Qifan Wu and Bin Zhao contributed equally to this work.

## Table of Contents for the Supporting Information

|                                                            |         |
|------------------------------------------------------------|---------|
| 1. Crystal data.....                                       | S3      |
| 2. Tables for Bioassay.....                                | S4-S5   |
| 3. Physico-Chemical Data of the Compounds Synthesized..... | S6-S12  |
| 4. NMR-Spectra.....                                        | S13-S36 |

## 1. Crystal data

**Table S1:** Crystal data and structure refinement for compound **6j**.

---

|                                   |                                                                                                              |
|-----------------------------------|--------------------------------------------------------------------------------------------------------------|
| Compd.                            | 6j                                                                                                           |
| Empirical formula                 | C <sub>22</sub> H <sub>15</sub> Br Cl <sub>2</sub> F <sub>3</sub> N <sub>5</sub> O <sub>2</sub>              |
| Formula weight                    | 637.32                                                                                                       |
| Temperature                       | 133(2) K                                                                                                     |
| Wavelength                        | 0.71073 Å                                                                                                    |
| Crystal system, space group       | Monoclinic, P2(1)/n                                                                                          |
| Unit cell dimensions              | a = 19.530(2) Å alpha = 90 deg.<br>b = 6.0340(5) Å beta = 105.189(2) deg.<br>c = 21.523(2) Å gamma = 90 deg. |
| Volume                            | 2447.7(4) Å <sup>3</sup>                                                                                     |
| Z, Calculated density             | 4, 1.729 Mg/m <sup>3</sup>                                                                                   |
| Absorption coefficient            | 2.119 mm <sup>-1</sup>                                                                                       |
| F (000)                           | 1272                                                                                                         |
| Crystal size                      | 0.20 x 0.18 x 0.12 mm                                                                                        |
| Theta range for data collection   | 3.13 to 27.57 deg.                                                                                           |
| Limiting indices                  | -25 ≤ h ≤ 25, -7 ≤ k ≤ 7, -27 ≤ l ≤ 27                                                                       |
| Reflections collected / unique    | 29802 / 5627 [R(int) = 0.0406]                                                                               |
| Completeness to theta             | 99.4 %                                                                                                       |
| Absorption correction             | Semi-empirical from equivalents                                                                              |
| Max. and min. transmission        | 0.7851 and 0.6766                                                                                            |
| Refinement method                 | Full-matrix least-squares on F <sup>2</sup>                                                                  |
| Data / restraints / parameters    | 5627 / 0 / 325                                                                                               |
| Goodness-of-fit on F <sup>2</sup> | 1.047                                                                                                        |
| Final R indices [I > 2σ(I)]       | R1 = 0.0309, wR2 = 0.0820                                                                                    |
| R indices (all data)              | R1 = 0.0397, wR2 = 0.0845                                                                                    |
| Largest diff. peak and hole       | 1.073 and -0.631 e.Å <sup>-3</sup>                                                                           |

---

## 2. Tables for Bioassay

**Table S2:** In vitro antifungal activities of compounds **6a-6u** at 50 mg/L

| Compd.          | Inhibition rate (%) $\pm$ SD |            |            |             |            |            |            |            |
|-----------------|------------------------------|------------|------------|-------------|------------|------------|------------|------------|
|                 | A. S <sup>a</sup>            | B. C       | C. A       | G. Z        | P. P       | P. S       | R. C       | S. S       |
| <b>6a</b>       | 53 $\pm$ 2                   | 41 $\pm$ 1 | 45 $\pm$ 0 | 72 $\pm$ 2  | 28 $\pm$ 0 | 28 $\pm$ 1 | 22 $\pm$ 2 | 50 $\pm$ 2 |
| <b>6b</b>       | 16 $\pm$ 0                   | 30 $\pm$ 2 | 17 $\pm$ 1 | 4 $\pm$ 0   | 30 $\pm$ 1 | 28 $\pm$ 1 | 0          | 100        |
| <b>6c</b>       | 19 $\pm$ 1                   | 60 $\pm$ 3 | 40 $\pm$ 2 | 33 $\pm$ 0  | 21 $\pm$ 2 | 51 $\pm$ 2 | 4 $\pm$ 1  | 73 $\pm$ 1 |
| <b>6d</b>       | 6 $\pm$ 0                    | 60 $\pm$ 2 | 2 $\pm$ 0  | -21 $\pm$ 2 | 28 $\pm$ 2 | 25 $\pm$ 1 | 1 $\pm$ 0  | 60 $\pm$ 0 |
| <b>6e</b>       | 7 $\pm$ 0                    | 41 $\pm$ 0 | 49 $\pm$ 1 | 2 $\pm$ 0   | 15 $\pm$ 0 | 14 $\pm$ 2 | 6 $\pm$ 0  | 28 $\pm$ 2 |
| <b>6f</b>       | 53 $\pm$ 3                   | 62 $\pm$ 3 | 64 $\pm$ 3 | 76 $\pm$ 3  | 44 $\pm$ 0 | 41 $\pm$ 2 | 46 $\pm$ 2 | 33 $\pm$ 0 |
| <b>6g</b>       | 43 $\pm$ 2                   | 35 $\pm$ 1 | 38 $\pm$ 2 | 60 $\pm$ 1  | 24 $\pm$ 2 | 15 $\pm$ 0 | 28 $\pm$ 2 | 50 $\pm$ 1 |
| <b>6h</b>       | 50 $\pm$ 2                   | 46 $\pm$ 2 | 62 $\pm$ 1 | -4 $\pm$ 0  | 57 $\pm$ 3 | 22 $\pm$ 0 | 50 $\pm$ 2 | 50 $\pm$ 2 |
| <b>6i</b>       | 38 $\pm$ 0                   | 30 $\pm$ 0 | 63 $\pm$ 0 | 67 $\pm$ 3  | 65 $\pm$ 3 | 48 $\pm$ 2 | 69 $\pm$ 3 | 8 $\pm$ 1  |
| <b>6j</b>       | 65 $\pm$ 1                   | 54 $\pm$ 2 | 60 $\pm$ 2 | 58 $\pm$ 2  | 65 $\pm$ 2 | 17 $\pm$ 1 | 53 $\pm$ 0 | 50 $\pm$ 3 |
| <b>6k</b>       | 13 $\pm$ 0                   | 10 $\pm$ 1 | 17 $\pm$ 1 | 28 $\pm$ 1  | 23 $\pm$ 0 | 26 $\pm$ 0 | 4 $\pm$ 0  | 58 $\pm$ 2 |
| <b>6l</b>       | 6 $\pm$ 1                    | 63 $\pm$ 2 | 30 $\pm$ 2 | 5 $\pm$ 1   | 25 $\pm$ 0 | 26 $\pm$ 1 | 11 $\pm$ 2 | 70 $\pm$ 4 |
| <b>6m</b>       | 1 $\pm$ 1                    | 67 $\pm$ 3 | 25 $\pm$ 1 | 9 $\pm$ 0   | 25 $\pm$ 2 | 11 $\pm$ 1 | 34 $\pm$ 1 | 43 $\pm$ 0 |
| <b>6n</b>       | 7 $\pm$ 0                    | 57 $\pm$ 1 | 21 $\pm$ 2 | 0           | 21 $\pm$ 1 | 25 $\pm$ 0 | 7 $\pm$ 0  | 48 $\pm$ 2 |
| <b>6o</b>       | 73 $\pm$ 3                   | 35 $\pm$ 0 | 32 $\pm$ 1 | 72 $\pm$ 4  | 65 $\pm$ 3 | 61 $\pm$ 2 | 62 $\pm$ 3 | 42 $\pm$ 1 |
| <b>6p</b>       | 16 $\pm$ 2                   | 23 $\pm$ 0 | 25 $\pm$ 1 | 4 $\pm$ 1   | 24 $\pm$ 0 | 0          | 13 $\pm$ 1 | 65 $\pm$ 2 |
| <b>6q</b>       | 13 $\pm$ 0                   | 33 $\pm$ 1 | 33 $\pm$ 1 | 14 $\pm$ 2  | 11 $\pm$ 0 | 11 $\pm$ 1 | 3 $\pm$ 0  | 21 $\pm$ 1 |
| <b>6r</b>       | 29 $\pm$ 0                   | 30 $\pm$ 1 | 13 $\pm$ 0 | 7 $\pm$ 1   | 34 $\pm$ 1 | 28 $\pm$ 1 | 18 $\pm$ 1 | 70 $\pm$ 3 |
| <b>6s</b>       | 74 $\pm$ 4                   | 69 $\pm$ 3 | 67 $\pm$ 0 | 68 $\pm$ 3  | 59 $\pm$ 2 | 53 $\pm$ 2 | 46 $\pm$ 2 | 67 $\pm$ 3 |
| <b>6t</b>       | 65 $\pm$ 2                   | 47 $\pm$ 1 | 63 $\pm$ 2 | 64 $\pm$ 2  | 62 $\pm$ 3 | 56 $\pm$ 2 | 39 $\pm$ 2 | 66 $\pm$ 2 |
| <b>6u</b>       | 51 $\pm$ 1                   | 50 $\pm$ 2 | 56 $\pm$ 1 | 68 $\pm$ 2  | 30 $\pm$ 1 | 40 $\pm$ 1 | 66 $\pm$ 0 | 65 $\pm$ 2 |
| Oxathiapiprolin | 10 $\pm$ 1                   | 56 $\pm$ 2 | 32 $\pm$ 2 | 100         | 16 $\pm$ 0 | 25 $\pm$ 1 | 20 $\pm$ 1 | 90 $\pm$ 3 |
| Isotianil       | 23 $\pm$ 1                   | 7 $\pm$ 1  | 17 $\pm$ 1 | 21 $\pm$ 1  | 24 $\pm$ 1 | 22 $\pm$ 0 | 16 $\pm$ 1 | 45 $\pm$ 2 |
| Azoxystrobin    | 44 $\pm$ 2                   | 79 $\pm$ 3 | 68 $\pm$ 1 | 100         | 65 $\pm$ 2 | 84 $\pm$ 2 | 100        | 100        |

<sup>a</sup> A. S: *Alternaria solani*, B. C: *Botrytis cinerea*, C. A: *Cercospora arachidicola*, G. Z: *Gibberella zea*, P. P: *Physalospora piricola*, P. S: *Pellicularia sasakii*, R. C: *Rhizoctonia cerealis* and S. S: *Sclerotinia sclerotiorum*

**Table S3:** In vivo antifungal activities of compounds **6a-6u** at 10 mg/L, 1 mg/L and 0.1 mg/L against *P. cubensis* and *P. infestans*.

| Compd.          | Inhibition rate (%) $\pm$ SD |            |            |                     |            |            |
|-----------------|------------------------------|------------|------------|---------------------|------------|------------|
|                 | <i>P. cubensis</i>           |            |            | <i>P. infestans</i> |            |            |
|                 | 10 mg/L                      | 1 mg/L     | 0.1 mg/L   | 10 mg/L             | 1 mg/L     | 0.1 mg/L   |
| <b>6a</b>       | //                           | //         | //         | //                  | //         | //         |
| <b>6b</b>       | 95 $\pm$ 3                   | 80 $\pm$ 2 | //         | 95 $\pm$ 3          | 40 $\pm$ 2 | 15 $\pm$ 1 |
| <b>6c</b>       | 40 $\pm$ 1                   | 10 $\pm$ 1 | //         | 40 $\pm$ 2          | 10 $\pm$ 1 | 0          |
| <b>6d</b>       | 35 $\pm$ 2                   | 10         | //         | 10 $\pm$ 0          | 0          | 0          |
| <b>6e</b>       | 10 $\pm$ 1                   | 0          | //         | 10 $\pm$ 1          | 0          | 0          |
| <b>6f</b>       | //                           | //         | //         | //                  | //         | //         |
| <b>6g</b>       | //                           | //         | //         | //                  | //         | //         |
| <b>6h</b>       | 10 $\pm$ 0                   | 0          | //         | //                  | //         | //         |
| <b>6i</b>       | //                           | //         | //         | 35 $\pm$ 0          | 10 $\pm$ 0 | 0          |
| <b>6j</b>       | //                           | //         | //         | //                  | //         | //         |
| <b>6k</b>       | 80 $\pm$ 0                   | 50 $\pm$ 1 | //         | 80 $\pm$ 3          | 35 $\pm$ 3 | 10 $\pm$ 1 |
| <b>6l</b>       | 70 $\pm$ 3                   | 40 $\pm$ 1 | //         | 60 $\pm$ 2          | 20 $\pm$ 1 | 0          |
| <b>6m</b>       | 95 $\pm$ 2                   | 70 $\pm$ 3 | //         | 90 $\pm$ 3          | 50 $\pm$ 2 | 20 $\pm$ 2 |
| <b>6n</b>       | 85 $\pm$ 3                   | 50 $\pm$ 2 | //         | 85 $\pm$ 2          | 45 $\pm$ 2 | 15 $\pm$ 0 |
| <b>6o</b>       | 10 $\pm$ 1                   | 0          | //         | //                  | //         | //         |
| <b>6p</b>       | 100                          | 98 $\pm$ 1 | 15 $\pm$ 1 | 100                 | 45 $\pm$ 1 | 20 $\pm$ 2 |
| <b>6q</b>       | 10 $\pm$ 0                   | 0          | //         | //                  | //         | //         |
| <b>6r</b>       | 50 $\pm$ 1                   | 20 $\pm$ 1 | //         | 35 $\pm$ 1          | 10 $\pm$ 0 | 0          |
| <b>6s</b>       | 98 $\pm$ 3                   | 20 $\pm$   | //         | 100                 | 35 $\pm$ 0 | 10 $\pm$ 0 |
| <b>6t</b>       | //                           | //         | //         | 70 $\pm$ 2          | 15 $\pm$ 1 | 10 $\pm$ 1 |
| <b>6u</b>       | 100                          | 100        | 30 $\pm$ 1 | 100                 | 85 $\pm$ 2 | 35 $\pm$ 2 |
| Oxathiapiprolin | 100                          | 98 $\pm$ 2 | 100        | 100                 | 98 $\pm$ 2 | 95 $\pm$ 4 |
| Isotianil       | 100                          | 70 $\pm$ 1 | 0          | 98 $\pm$ 2          | 45 $\pm$ 0 | 15 $\pm$ 0 |

**Table S4:** In vivo antifungal activities of compounds **6p** and **6u** at 0.01 mg/L and 0.001 mg/L against *P. cubensis* and *P. infestans*.

| Compd.          | Inhibition rate (%) $\pm$ SD |            |
|-----------------|------------------------------|------------|
|                 | 0.01 mg/L                    | 0.001 mg/L |
| <b>6p</b>       | 10 $\pm$ 1                   | 0          |
| <b>6u</b>       | 10 $\pm$ 0                   | 0          |
| Oxathiapiprolin | 70 $\pm$ 3                   | 15 $\pm$ 1 |
| Isotianil       | 0                            | 0          |

### 3. Physico-Chemical Data of the Compounds Synthesized

*2-Bromo-1-(3,4-dichloroisothiazol-5-yl)ethanone (2)*: White solid, m.p. 52-53 °C, yield 100%. <sup>1</sup>H NMR (400 MHz, CDCl<sub>3</sub>) δ 4.47 (d, *J* = 2.9 Hz, 2H, CH<sub>2</sub>). <sup>13</sup>C NMR (101 MHz, CDCl<sub>3</sub>) δ 182.30 (s), 156.43 (s), 150.49 (s), 123.25 (s), 32.26 (s). HRMS (ESI) [M-H]<sup>-</sup> calcd for C<sub>5</sub>H<sub>2</sub>BrCl<sub>2</sub>NOS (M-H)<sup>-</sup>: 271.8418, found: 271.8344.

*tert-Butyl 4-(4-(3,4-dichloroisothiazol-5-yl)thiazol-2-yl)piperidine-1-carboxylate (4)*: White crystal, m.p. 153-155 °C, yield 43%. <sup>1</sup>H NMR (400 MHz, CDCl<sub>3</sub>) δ 8.04 (s, 1H), 4.21 (t, *J* = 10.7 Hz, 2H), 3.19 (m, 1H), 2.93 (t, *J* = 12.1 Hz, 2H), 2.13 (m, 2H), 1.77 (m, 2H), 1.46 (s, 9H). <sup>13</sup>C NMR (101 MHz, CDCl<sub>3</sub>) δ 175.31 (s), 155.10 (s), 154.66 (s), 148.73 (s), 143.35 (s), 116.74 (s), 79.75 (s), 43.40 (s), 40.38 (s), 32.19 (s), 28.44 (s). HRMS (ESI) [M+H]<sup>+</sup> calcd for C<sub>16</sub>H<sub>19</sub>Cl<sub>2</sub>N<sub>3</sub>O<sub>2</sub>S<sub>2</sub> [M+H]<sup>+</sup>: 420.0296, found: 420.0345.

*3,4-Dichloro-5-(2-(piperidin-4-yl)thiazol-4-yl)isothiazole (5)*: White solid, m.p. 97-99 °C, yield 91%. <sup>1</sup>H NMR (400 MHz, CDCl<sub>3</sub>) δ 8.04 (s, 1H), 5.31 (s, 1H), 3.22 (t, *J* = 11.6 Hz, 2H), 3.17 (s, 1H), 2.78 (t, *J* = 11.7 Hz, 2H), 2.14 (m, 2H), 1.76 (m, 2H). <sup>13</sup>C NMR (101 MHz, CDCl<sub>3</sub>) δ 176.51 (s), 155.26 (s), 148.73 (s), 143.20 (s), 116.66 (s), 46.25 (s), 40.86 (s), 33.66 (s). HRMS (ESI) [M+H]<sup>+</sup> calcd for C<sub>11</sub>H<sub>11</sub>Cl<sub>2</sub>N<sub>3</sub>S<sub>2</sub> [M+H]<sup>+</sup>: 319.9771, found: 319.9850.

*1-(4-(4-(3,4-Dichloroisothiazol-5-yl)thiazol-2-yl)piperidin-1-yl)-2-(5-methyl-3-(trifluoromethyl)-1H-pyrazol-1-yl)ethanone (6a)*: White solid, m.p. >200 °C, yield 60%. <sup>1</sup>H NMR (400 MHz, CDCl<sub>3</sub>) δ 8.08 (s, 1H), 6.35 (s, 1H), 5.01 (s, 2H), 4.58 (d, *J* = 13.3 Hz, 1H), 4.08 (d, *J* = 12.5 Hz, 1H), 3.33 (s, 2H), 2.93 (m, 1H), 2.34 (s, 3H), 2.22 (m, 2H), 1.91 – 1.68 (m, 2H). <sup>13</sup>C NMR (101 MHz, DMSO) δ 175.78 (s), 164.20 (s), 155.15 (s), 147.85 (s), 142.28 (s), 141.62 (s), 131.49 (s), 128.63 (s), 119.28 (s), 103.47 (s), 64.99 (s), 51.08 (s), 43.86 (s), 41.15 (s), 31.96 (s), 31.62 (s), 10.60 (s). HRMS (ESI) [M+H]<sup>+</sup> calcd for C<sub>18</sub>H<sub>16</sub>Cl<sub>2</sub>F<sub>3</sub>N<sub>5</sub>OS<sub>2</sub> [M+H]<sup>+</sup>: 510.0125, found: 510.0203.

*1-(4-(4-(3,4-Dichloroisothiazol-5-yl)thiazol-2-yl)piperidin-1-yl)-2-phenylethanone (6b)*: White solid, m.p. 135-136 °C, yield 96%. <sup>1</sup>H NMR (400 MHz, CDCl<sub>3</sub>) δ 7.98 (s, 1H), 7.26 (dd, *J* = 21.2, 6.6 Hz, 5H), 4.64 (d, *J* = 13.1 Hz, 1H), 3.93 (d, *J* = 13.4 Hz, 1H), 3.75 (s, 2H), 3.25 – 3.06 (m, 2H), 2.81 m, 1H), 2.05 (m, 2H), 1.76 – 1.63 (m, 1H), 1.46 (m,

1H). <sup>13</sup>C NMR (101 MHz, CDCl<sub>3</sub>) δ 174.61 (s), 169.55 (s), 155.01 (s), 148.73 (s), 143.29 (s), 134.99 (s), 128.81 (s), 128.59 (s), 126.89 (s), 116.91 (s), 45.77 (s), 41.52 (s), 41.19 (s), 40.03 (s), 32.21 (s), 31.88 (s). HRMS (ESI) [M+H]<sup>+</sup> calcd for C<sub>19</sub>H<sub>17</sub>Cl<sub>2</sub>N<sub>3</sub>OS<sub>2</sub> [M+H]<sup>+</sup>: 438.0190, found: 438.0261.

*(4-(4-(3,4-Dichloroisothiazol-5-yl)thiazol-2-yl)piperidin-1-yl)(5-(difluoromethyl)-1-phenyl-1H-pyrazol-4-yl)methanone (6c)*: White solid, m.p. 125-127 °C, yield 95%. <sup>1</sup>H NMR (400 MHz, CDCl<sub>3</sub>) δ 8.10 (s, 1H), 7.78 (s, 1H), 7.54 (s, 5H), 6.93 (t, *J* = 53.0 Hz, 1H), 4.76 (s, 1H), 4.24 (d, *J* = 64.7 Hz, 1H), 3.38 (s, 2H), 3.14 (s, 1H), 2.27 (m, 2H), 1.91 (m, 2H). <sup>13</sup>C NMR (101 MHz, CDCl<sub>3</sub>) δ 174.36 (s), 162.42 (s), 154.96 (s), 148.85 (s), 143.49 (s), 138.90 (s), 138.50 (s), 134.74 (s), 129.47 (s), 129.33 (s), 125.45 (s), 118.64 (s), 116.94 (s), 107.97 (t, *J* = 237.2 Hz), 47.24 (s), 41.75 (s), 40.15 (s), 32.18 (s), 30.58 (s). HRMS (ESI) [M+H]<sup>+</sup> calcd for C<sub>22</sub>H<sub>17</sub>Cl<sub>2</sub>F<sub>2</sub>N<sub>5</sub>OS<sub>2</sub> [M+H]<sup>+</sup>: 540.0220, found: 540.0299.

*(4-(4-(3,4-Dichloroisothiazol-5-yl)thiazol-2-yl)piperidin-1-yl)(5-(difluoromethyl)-1-(4-fluorophenyl)-1H-pyrazol-4-yl)methanone (6d)*: White crystal, m.p. 139-141 °C, yield 96%. <sup>1</sup>H NMR (400 MHz, CDCl<sub>3</sub>) δ 8.09 (s, 1H), 7.77 (s, 1H), 7.49 (dd, *J* = 14.2, 8.0 Hz, 1H), 7.35 (dd, *J* = 19.4, 8.6 Hz, 2H), 7.21 (t, *J* = 8.2 Hz, 1H), 6.98 (t, *J* = 52.8 Hz, 1H), 4.74 (s, 1H), 4.27 (dd, *J* = 35.7, 29.1 Hz, 1H), 3.37 (t, *J* = 12.8, 9.3 Hz, 2H), 3.13 (m, 1H), 2.28 (m, 2H), 1.99 – 1.80 (m, 2H). <sup>13</sup>C NMR (101 MHz, CDCl<sub>3</sub>) δ 174.95 (s), 164.49 (s), 162.84 (s), 162.02 (s), 155.63 (s), 149.56 (s), 144.21 (s), 140.87 (d, *J* = 10.0 Hz), 139.46 (s), 131.25 (s), 121.74 (s), 119.90 (s), 117.63 (s), 117.21 (s), 113.90 (s), 108.45 (t, *J* = 237.5 Hz), 47.89 (s), 42.54 (s), 40.80 (s), 32.91 (s), 32.09 (s). HRMS (ESI) [M+H]<sup>+</sup> calcd for C<sub>22</sub>H<sub>16</sub>Cl<sub>2</sub>F<sub>3</sub>N<sub>5</sub>OS<sub>2</sub> [M+H]<sup>+</sup>: 558.0125, found: 558.0197.

*(1-(4-Chlorophenyl)-5-(difluoromethyl)-1H-pyrazol-4-yl)(4-(4-(3,4-dichloroisothiazol-5-yl)thiazol-2-yl)piperidin-1-yl)methanone (6e)*: White solid, m.p. 153-155 °C, yield 100%. <sup>1</sup>H NMR (400 MHz, CDCl<sub>3</sub>) δ 8.09 (s, 1H), 7.77 (s, 1H), 7.50 (s, 4H), 6.99 (t, *J* = 52.8 Hz, 1H), 4.73 (s, 1H), 4.27 – 4.00 (m, 1H), 3.38 (t, *J* = 10.9 Hz, 2H), 3.12 (m, 1H), 2.28 (m, 2H), 1.91 (m, 2H). <sup>13</sup>C NMR (101 MHz, CDCl<sub>3</sub>) δ 174.24 (s), 162.17 (s), 154.93 (s), 148.86 (s), 143.50 (s), 138.70 (s), 137.55 (s), 135.43 (s), 130.93 (s), 129.48 (s), 126.70 (s), 119.10 (s), 116.95 (s), 107.75 (t, *J* = 237.4 Hz), 47.08 (s), 41.87 (s), 40.10 (s), 32.06 (s), 30.57 (s). HRMS (ESI) [M+H]<sup>+</sup> calcd for C<sub>22</sub>H<sub>16</sub>Cl<sub>3</sub>F<sub>2</sub>N<sub>5</sub>OS<sub>2</sub> [M+H]<sup>+</sup>:

573.9830, found: 573.9901.

*(1-(4-Bromophenyl)-5-(difluoromethyl)-1H-pyrazol-4-yl)(4-(4-(3,4-dichloroisothiazol-5-yl)thiazol-2-yl)piperidin-1-yl)methanone (6f)*: White solid, m.p. 163-164 °C, yield 91%. <sup>1</sup>H NMR (400 MHz, CDCl<sub>3</sub>) δ 8.09 (s, 1H), 7.77 (s, 1H), 7.65 (d, *J* = 8.3 Hz, 2H), 7.44 (d, *J* = 8.2 Hz, 2H), 6.98 (t, *J* = 52.8 Hz, 1H), 4.73 (s, 1H), 4.28 – 4.04 (m, 1H), 3.38 (t, *J* = 10.8 Hz, 2H), 3.12 (m, 1H), 2.28 (m, 2H), 1.91 (m, 2H). <sup>13</sup>C NMR (101 MHz, CDCl<sub>3</sub>) δ 173.20 (s), 161.14 (s), 153.89 (s), 147.81 (s), 142.45 (s), 137.70 (s), 137.02 (s), 134.07 (s), 131.43 (s), 125.90 (s), 122.43 (s), 118.10 (s), 115.93 (s), 106.71 (t, *J* = 237.4 Hz), 46.19 (s), 40.87 (s), 39.05 (s), 31.23 (s), 30.89 (s). HRMS (ESI) [M+H]<sup>+</sup> calcd for C<sub>22</sub>H<sub>16</sub>BrCl<sub>2</sub>F<sub>2</sub>N<sub>5</sub>OS<sub>2</sub> [M+H]<sup>+</sup>: 617.9325, found: 617.9505.

*(4-(4-(3,4-Dichloroisothiazol-5-yl)thiazol-2-yl)piperidin-1-yl)(1-phenyl-5-(trifluoromethyl)-1H-pyrazol-4-yl)methanone (6g)*: White solid, m.p. 181-183 °C, yield 92%. <sup>1</sup>H NMR (400 MHz, CDCl<sub>3</sub>) δ 8.09 (s, 1H), 7.76 (s, 1H), 7.50 (d, *J* = 8.2 Hz, 5H), 4.79 (d, *J* = 12.8 Hz, 1H), 3.91 (d, *J* = 12.7 Hz, 1H), 3.34 (t, *J* = 14.6 Hz, 2H), 3.10 (m, 1H), 2.26 (m, 2H), 1.87 (m, 2H). <sup>13</sup>C NMR (101 MHz, CDCl<sub>3</sub>) δ 174.24 (s), 161.65 (s), 154.94 (s), 148.86 (s), 143.48 (s), 138.68 (s), 138.10 (s), 129.88 (s), 129.27 (s), 125.80 (s), 120.85 (s), 119.52 (s), 118.16 (s), 116.97 (s), 46.97 (s), 41.49 (s), 40.03 (s), 32.30 (s), 31.74 (s). HRMS (ESI) [M+H]<sup>+</sup> calcd for C<sub>22</sub>H<sub>16</sub>Cl<sub>2</sub>F<sub>3</sub>N<sub>5</sub>OS<sub>2</sub> [M+H]<sup>+</sup>: 558.0125, found: 558.0190.

*(4-(4-(3,4-Dichloroisothiazol-5-yl)thiazol-2-yl)piperidin-1-yl)(1-(4-fluorophenyl)-5-(trifluoromethyl)-1H-pyrazol-4-yl)methanone (6h)*: White powder, m.p. 187-189 °C, yield 65%. <sup>1</sup>H NMR (400 MHz, CDCl<sub>3</sub>) δ 8.01 (s, 1H), 7.68 (s, 1H), 7.40 (dd, *J* = 8.6, 4.6 Hz, 2H), 7.13 (t, *J* = 8.4 Hz, 2H), 4.71 (d, *J* = 13.4 Hz, 1H), 3.81 (d, *J* = 13.4 Hz, 1H), 3.28 (d, *J* = 3.4 Hz, 1H), 3.25 (s, 1H), 3.02 (m, 1H), 2.18 (m, 2H), 1.89 – 1.71 (m, 2H). <sup>13</sup>C NMR (101 MHz, CDCl<sub>3</sub>) δ 173.13 (s), 163.30 (s), 160.81 (s), 160.44 (s), 153.87 (s), 147.84 (s), 142.45 (s), 137.16 (s), 133.65 (s), 126.84 (d, *J* = 9.0 Hz), 119.72 (s), 118.55 (s), 117.03 (s), 115.63 (dd, *J* = 67.0, 15.0 Hz), 45.92 (s), 40.46 (s), 38.95 (s), 31.24 (s), 30.68 (s). HRMS (ESI) [M+H]<sup>+</sup> calcd for C<sub>22</sub>H<sub>15</sub>Cl<sub>2</sub>F<sub>4</sub>N<sub>5</sub>OS<sub>2</sub> [M+H]<sup>+</sup>: 576.0031, found: 576.0100.

*(1-(4-Chlorophenyl)-5-(trifluoromethyl)-1H-pyrazol-4-yl)(4-(4-(3,4-dichloroisothiazol-*



*5-yl)thiazol-2-yl)piperidin-1-yl)methanone (6i)*: White solid, m.p. 133-135 °C, yield 73%. <sup>1</sup>H NMR (400 MHz, CDCl<sub>3</sub>) δ 8.10 (s, 1H), 7.77 (s, 1H), 7.54 – 7.48 (m, 2H), 7.45 (d, *J* = 8.7 Hz, 2H), 4.79 (d, *J* = 13.5 Hz, 1H), 3.90 (d, *J* = 13.6 Hz, 1H), 3.42 – 3.28 (m, 2H), 3.11 (m, 1H), 2.27 (m, 2H), 1.87 (m, 2H). <sup>13</sup>C NMR (101 MHz, CDCl<sub>3</sub>) δ 174.15 (s), 161.39 (s), 154.91 (s), 148.87 (s), 143.52 (s), 138.40 (s), 137.15 (s), 135.96 (s), 129.52 (s), 127.05 (s), 120.77 (s), 119.88 (s), 118.08 (s), 116.94 (s), 46.94 (s), 41.49 (s), 39.99 (s), 32.28 (s), 31.71 (s). HRMS (ESI) [M+H]<sup>+</sup> calcd for C<sub>22</sub>H<sub>15</sub>Cl<sub>3</sub>F<sub>3</sub>N<sub>5</sub>OS<sub>2</sub> [M+H]<sup>+</sup>: 591.9736, found: 591.9806.

*(1-(4-Bromophenyl)-5-(trifluoromethyl)-1H-pyrazol-4-yl)(4-(4-(3,4-dichloroisothiazol-5-yl)thiazol-2-yl)piperidin-1-yl)methanone (6j)*: White solid, m.p. 166-168 °C, yield 96%. <sup>1</sup>H NMR (400 MHz, CDCl<sub>3</sub>) δ 8.06 (d, *J* = 5.2 Hz, 1H), 7.77 (d, *J* = 4.5 Hz, 1H), 7.63 (s, 2H), 7.36 (s, 2H), 4.75 (s, 1H), 3.87 (s, 1H), 3.32 (s, 2H), 3.09 (s, 1H), 2.23 (m, 2H), 1.84 (m, 2H). <sup>13</sup>C NMR (101 MHz, CDCl<sub>3</sub>) δ 173.11 (s), 160.27 (s), 153.87 (s), 147.68 (s), 142.32 (s), 137.39 (s), 136.61 (s), 131.43 (s), 126.22 (s), 122.89 (s), 119.71 (s), 118.91 (s), 117.02 (s), 115.96 (s), 45.88 (s), 40.42 (s), 38.87 (s), 31.33 (s), 30.91 (s). HRMS (ESI) [M+H]<sup>+</sup> calcd for C<sub>22</sub>H<sub>15</sub>BrCl<sub>2</sub>F<sub>3</sub>N<sub>5</sub>OS<sub>2</sub> [M+H]<sup>+</sup>: 635.9231, found: 635.9305.

*(5-Chloro-1-phenyl-3-(trifluoromethyl)-1H-pyrazol-4-yl)(4-(4-(3,4-dichloroisothiazol-5-yl)thiazol-2-yl)piperidin-1-yl)methanone (6k)*: White solid, m.p. 167-169 °C, yield 90%. <sup>1</sup>H NMR (400 MHz, CDCl<sub>3</sub>) δ 7.86 (d, *J* = 74.7 Hz, 1H), 7.50 – 7.04 (m, 5H), 4.60 (s, 1H), 3.59 (d, *J* = 64.5 Hz, 1H), 3.12 (t, *J* = 64.9 Hz, 2H), 2.99 – 2.75 (m, 1H), 2.12 (m, 2H), 1.71 (m, 2H). <sup>13</sup>C NMR (101 MHz, CDCl<sub>3</sub>) δ 174.17 (s), 159.72 (s), 154.92 (s), 148.88 (s), 143.49 (s), 136.79 (s), 129.85 (s), 129.45 (s), 125.30 (s), 121.60 (s), 121.60 (s), 118.92 (s), 116.99 (s), 114.77 (s), 46.80 (s), 41.68 (s), 40.01 (s), 32.60 (m), 31.80 (s). HRMS (ESI) [M+H]<sup>+</sup> calcd for C<sub>22</sub>H<sub>15</sub>Cl<sub>3</sub>F<sub>3</sub>N<sub>5</sub>OS<sub>2</sub> [M+H]<sup>+</sup>: 591.9736, found: 591.9812.

*(5-Chloro-1-(4-fluorophenyl)-3-(trifluoromethyl)-1H-pyrazol-4-yl)(4-(4-(3,4-dichloroisothiazol-5-yl)thiazol-2-yl)piperidin-1-yl)methanone (6l)*: White solid, m.p. 145-147 °C, yield 74%. <sup>1</sup>H NMR (400 MHz, CDCl<sub>3</sub>) δ 8.01 (s, 1H), 7.49 (dd, *J* = 8.7, 4.6 Hz, 2H), 7.17 (dd, *J* = 14.8, 6.4 Hz, 2H), 4.68 (s, 1H), 3.74 (d, *J* = 13.1 Hz, 1H), 3.28 (t, *J* = 10.8 Hz, 2H), 3.09 (s, 1H), 2.19 (m, 2H), 1.81 (m, 2H). <sup>13</sup>C NMR (101 MHz, CDCl<sub>3</sub>) δ 173.07 (s), 163.21 (s), 160.71 (s), 158.54 (s), 153.88 (s), 147.84 (s), 142.46 (s), 131.81

(s), 126.40 (s), 126.31 (s), 120.49 (s), 117.80 (s), 115.96 (s), 115.63 (s), 115.39 (s), 113.80 (s), 45.72 (s), 40.55 (s), 38.92 (s), 31.52 (s), 30.73 (s). HRMS (ESI) [M+H]<sup>+</sup> calcd for C<sub>22</sub>H<sub>14</sub>Cl<sub>3</sub>F<sub>4</sub>N<sub>5</sub>OS<sub>2</sub> [M+H]<sup>+</sup>: 609.9641, found: 609.9711.

*(5-Chloro-1-(4-chlorophenyl)-3-(trifluoromethyl)-1H-pyrazol-4-yl)(4-(4-(3,4-dichloroisothiazol-5-yl)thiazol-2-yl)piperidin-1-yl)methanone (6m)*: White solid, m.p. 171-173 °C, yield 64%. <sup>1</sup>H NMR (400 MHz, CDCl<sub>3</sub>) δ 8.01 (s, 1H), 7.45 (s, 4H), 4.68 (s, 1H), 3.73 (d, *J* = 13.2 Hz, 1H), 3.28 (t, *J* = 10.7 Hz, 2H), 3.09 (s, 1H), 2.35 – 2.09 (m, 2H), 1.81 (m, 2H). <sup>13</sup>C NMR (101 MHz, CDCl<sub>3</sub>) δ 174.77 (s), 160.19 (s), 155.60 (s), 149.59 (s), 144.22 (s), 136.62 (s), 135.95 (s), 131.62 (s), 130.37 (s), 127.16 (s), 122.19 (s), 119.50 (s), 117.67 (s), 115.76 (s), 47.42 (s), 42.29 (s), 40.62 (s), 33.25 (s), 33.25 (s), 32.45 (s). HRMS (ESI) [M+H]<sup>+</sup> calcd for C<sub>22</sub>H<sub>14</sub>Cl<sub>4</sub>F<sub>3</sub>N<sub>5</sub>OS<sub>2</sub> [M+H]<sup>+</sup>: 625.9346, found: 625.9415.

*(1-(4-Bromophenyl)-5-chloro-3-(trifluoromethyl)-1H-pyrazol-4-yl)(4-(4-(3,4-dichloroisothiazol-5-yl)thiazol-2-yl)piperidin-1-yl)methanone (6n)*: White powder, m.p. 176-178 °C, yield 60%. <sup>1</sup>H NMR (400 MHz, CDCl<sub>3</sub>) δ 7.99 (s, 1H), 7.56 – 7.34 (m, 4H), 4.66 (s, 1H), 3.73 (d, *J* = 13.1 Hz, 1H), 3.27 (t, *J* = 10.7 Hz, 2H), 3.07 (s, 1H), 2.18 (m, 2H), 1.80 (m, 2H). <sup>13</sup>C NMR (101 MHz, CDCl<sub>3</sub>) δ 173.04 (s), 158.44 (s), 153.87 (s), 147.78 (s), 142.40 (s), 134.84 (s), 134.18 (s), 131.61 (s), 129.91 (s), 128.63 (s), 127.80 (s), 125.42 (s), 120.45 (s), 117.76 (s), 115.98 (s), 114.01 (s), 45.76 (s), 40.59 (s), 38.92 (s), 31.56 (s), 30.70 (s). HRMS (ESI) [M+H]<sup>+</sup> calcd for C<sub>22</sub>H<sub>14</sub>BrCl<sub>3</sub>F<sub>3</sub>N<sub>5</sub>OS<sub>2</sub> [M+H]<sup>+</sup>: 669.8841, found: 669.8881.

*(3-Bromo-1-(3-chloropyridin-2-yl)-1H-pyrazol-5-yl)(4-(4-(3,4-dichloroisothiazol-5-yl)thiazol-2-yl)piperidin-1-yl)methanone (6o)*: White powder, m.p. >200 °C, yield 98%. <sup>1</sup>H NMR (400 MHz, CDCl<sub>3</sub>) δ 8.43 (d, *J* = 4.5 Hz, 1H), 8.09 (s, 1H), 7.92 (d, *J* = 8.1 Hz, 1H), 7.36 (dd, *J* = 8.0, 4.7 Hz, 1H), 6.57 (s, 1H), 4.59 (s, 1H), 4.24 (s, 1H), 3.34 (s, 2H), 2.97 (m, 1H), 2.17 (m, 2H), 1.92 (m, 2H). <sup>13</sup>C NMR (101 MHz, CDCl<sub>3</sub>) δ 174.20 (s), 159.37 (s), 154.93 (s), 148.90 (s), 147.64 (s), 146.48 (s), 143.52 (s), 140.13 (s), 139.47 (s), 127.73 (s), 127.17 (s), 125.21 (s), 116.91 (s), 109.98 (s), 47.16 (s), 41.89 (s), 40.06 (s), 32.15 (s), 31.70 (s). HRMS (ESI) [M+H]<sup>+</sup> calcd for C<sub>20</sub>H<sub>14</sub>BrCl<sub>3</sub>N<sub>6</sub>OS<sub>2</sub> [M+H]<sup>+</sup>: 602.8919, found: 602.8979.

*(4-(4-(3,4-Dichloroisothiazol-5-yl)thiazol-2-yl)piperidin-1-yl)(phenyl)methanone (6p)*:

White crystal, m.p. 163-164 °C, yield 98%. <sup>1</sup>H NMR (400 MHz, CDCl<sub>3</sub>) δ 7.95 (s, 1H), 7.33 (s, 5H), 4.68 (s, 1H), 3.81 (s, 1H), 3.23 (m, 1H), 3.04 (t, *J* = 55.1 Hz, 2H), 2.10 (m, 2H), 1.74 (m, 2H). <sup>13</sup>C NMR (101 MHz, CDCl<sub>3</sub>) δ 174.60 (s), 170.57 (s), 155.00 (s), 148.72 (s), 143.31 (s), 135.78 (s), 129.81 (s), 128.57 (s), 126.94 (s), 117.00 (s), 47.40 (s), 41.07 (d, *J* = 166.2 Hz), 32.35 (d, *J* = 46.9 Hz). HRMS (ESI) [M+H]<sup>+</sup> calcd for C<sub>18</sub>H<sub>15</sub>Cl<sub>2</sub>N<sub>3</sub>OS<sub>2</sub> [M+H]<sup>+</sup>: 424.0034, found: 424.0109.

*(4-(4-(3,4-Dichloroisothiazol-5-yl)thiazol-2-yl)piperidin-1-yl)(4-fluorophenyl)methanone (6q)*: White crystal, m.p. 164-165 °C, yield 69%. <sup>1</sup>H NMR (400 MHz, CDCl<sub>3</sub>) δ 8.08 (s, 1H), 7.50 – 7.39 (m, 2H), 7.12 (t, *J* = 8.3 Hz, 2H), 4.74 (s, 1H), 3.92 (s, 1H), 3.34 (t, *J* = 11.3 Hz, 1H), 3.14 (s, 2H), 2.22 (s, 2H), 1.86 (s, 2H). <sup>13</sup>C NMR (101 MHz, CDCl<sub>3</sub>) δ 174.46 (s), 169.61 (s), 164.67 (s), 162.18 (s), 154.96 (s), 148.76 (s), 143.38 (s), 131.81 (s), 129.29 (s), 116.95 (s), 115.74 (s), 115.53 (s), 47.37 (s), 40.21 (s), 32.33 (s). HRMS (ESI) [M+H]<sup>+</sup> calcd for C<sub>18</sub>H<sub>14</sub>Cl<sub>2</sub>FN<sub>3</sub>OS<sub>2</sub> [M+H]<sup>+</sup>: 441.9939, found: 442.0008.

*(4-Chlorophenyl)(4-(4-(3,4-dichloroisothiazol-5-yl)thiazol-2-yl)piperidin-1-yl)methanone (6r)*: White solid, m.p. 179-181 °C, yield 88%. <sup>1</sup>H NMR (400 MHz, CDCl<sub>3</sub>) δ 8.08 (s, 1H), 7.50 – 7.32 (m, 4H), 4.74 (s, 1H), 3.88 (s, 1H), 3.39 – 3.28 (m, 1H), 3.14 (t, *J* = 42.4 Hz, 2H), 2.20 (m, 2H), 1.85 (m, 2H). <sup>13</sup>C NMR (101 MHz, CDCl<sub>3</sub>) δ 174.40 (s), 169.50 (s), 154.94 (s), 148.87 (s), 143.49 (s), 135.93 (s), 134.14 (s), 128.87 (s), 128.53 (s), 116.92 (s), 47.47 (s), 40.23 (s), 32.17 (s). HRMS (ESI) [M+H]<sup>+</sup> calcd for C<sub>18</sub>H<sub>14</sub>Cl<sub>3</sub>N<sub>3</sub>OS<sub>2</sub> [M+H]<sup>+</sup>: 457.9644, found: 457.9711.

*(3-Chlorophenyl)(4-(4-(3,4-dichloroisothiazol-5-yl)thiazol-2-yl)piperidin-1-yl)methanone (6s)*: White solid, m.p. 116-118 °C, yield 62%. <sup>1</sup>H NMR (400 MHz, CDCl<sub>3</sub>) δ 8.09 (s, 1H), 7.47 – 7.30 (m, 4H), 4.76 (s, 1H), 3.88 (s, 1H), 3.35 (m, 1H), 3.16 (t, *J* = 51.4 Hz, 2H), 2.23 (m, 2H), 1.87 (m, 2H). <sup>13</sup>C NMR (101 MHz, CDCl<sub>3</sub>) δ 173.33 (s), 167.94 (s), 153.91 (s), 147.84 (s), 142.48 (s), 136.50 (s), 133.68 (s), 132.29 (s), 128.94 (s), 126.13 (s), 123.98 (s), 115.88 (s), 46.34 (s), 40.85 (s), 39.17 (s), 31.43 (s), 30.99 (s). HRMS (ESI) [M+H]<sup>+</sup> calcd for C<sub>18</sub>H<sub>14</sub>Cl<sub>3</sub>N<sub>3</sub>OS<sub>2</sub> [M+H]<sup>+</sup>: 457.9644, found: 457.9715.

*(4-Bromophenyl)(4-(4-(3,4-dichloroisothiazol-5-yl)thiazol-2-yl)piperidin-1-yl)methanone (6t)*: White crystal, m.p. 187-189 °C, yield 60%. <sup>1</sup>H NMR (400 MHz,

CDCl<sub>3</sub>) δ 8.10 (s, 1H), 7.59 (d, *J* = 7.7 Hz, 2H), 7.35 (d, *J* = 7.7 Hz, 2H), 4.76 (s, 1H), 3.89 (s, 1H), 3.36 (s, 1H), 3.16 (t, *J* = 45.6 Hz, 2H), 2.27 (m, 2H), 1.88 (m, 2H). <sup>13</sup>C NMR (101 MHz, CDCl<sub>3</sub>) δ 174.37 (s), 169.56 (s), 154.94 (s), 148.88 (s), 143.49 (s), 134.57 (s), 131.83 (s), 128.71 (s), 124.18 (s), 116.92 (s), 40.21 (s), 30.58 (s), 29.71 (s). HRMS (ESI) [M+H]<sup>+</sup> calcd for C<sub>18</sub>H<sub>14</sub>BrCl<sub>2</sub>N<sub>3</sub>OS<sub>2</sub> [M+H]<sup>+</sup>: 501.9139, found: 501.9209.

*(3-Bromophenyl)(4-(4-(3,4-dichloroiso-thiazol-5-yl)thiazol-2-yl)piperidin-1-yl)methanone (6u)*: White solid, m.p. 117-119 °C, yield 60%. <sup>1</sup>H NMR (400 MHz, CDCl<sub>3</sub>) δ 7.99 (s, 1H), 7.49 (d, *J* = 11.8 Hz, 2H), 7.34 – 7.18 (m, 2H), 4.66 (s, 1H), 3.78 (s, 1H), 3.25 (m, 1H), 3.07 (t, *J* = 66.6 Hz, 2H), 2.13 (m, 2H), 1.77 (m, 2H). <sup>13</sup>C NMR (101 MHz, CDCl<sub>3</sub>) δ 174.34 (s), 168.83 (s), 154.94 (s), 148.81 (s), 143.40 (s), 137.69 (s), 132.89 (s), 130.23 (s), 130.00 (s), 125.46 (s), 122.75 (s), 116.99 (s), 47.36 (s), 41.88 (s), 40.14 (s), 32.63 (s), 31.99(s). HRMS (ESI) [M+H]<sup>+</sup> calcd for C<sub>18</sub>H<sub>14</sub>BrCl<sub>2</sub>N<sub>3</sub>OS<sub>2</sub> [M+H]<sup>+</sup>: 501.9139, found: 501.9216.

## 4. NMR-Spectra

$^1\text{H}$  NMR (400 MHz,  $\text{CDCl}_3$ ) of compound **2**

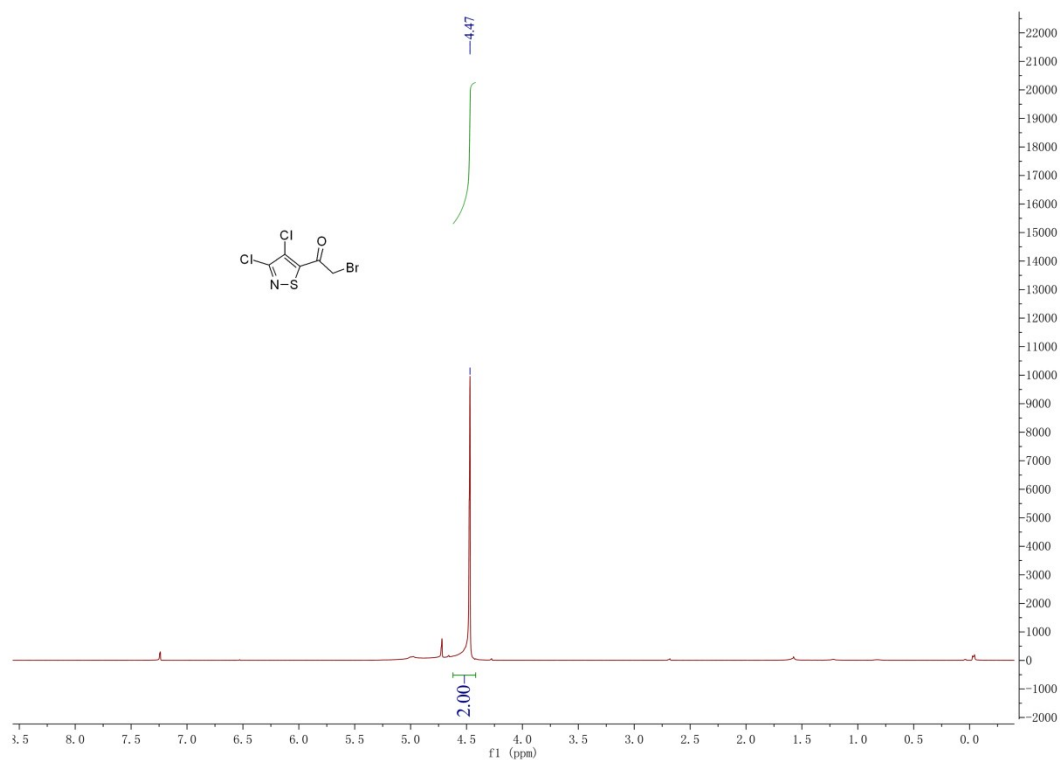

$^{13}\text{C}$  NMR (101 MHz,  $\text{CDCl}_3$ ) of compound **2**

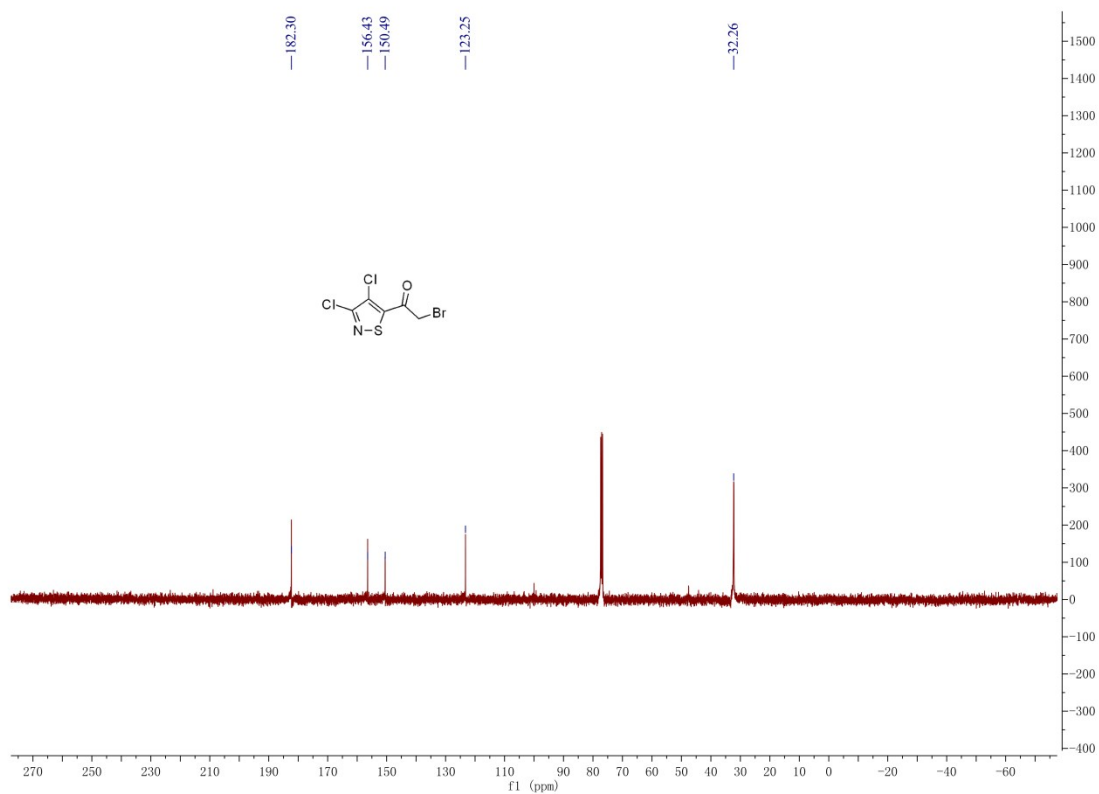

<sup>1</sup>H NMR (400 MHz, CDCl<sub>3</sub>) of compound **4**

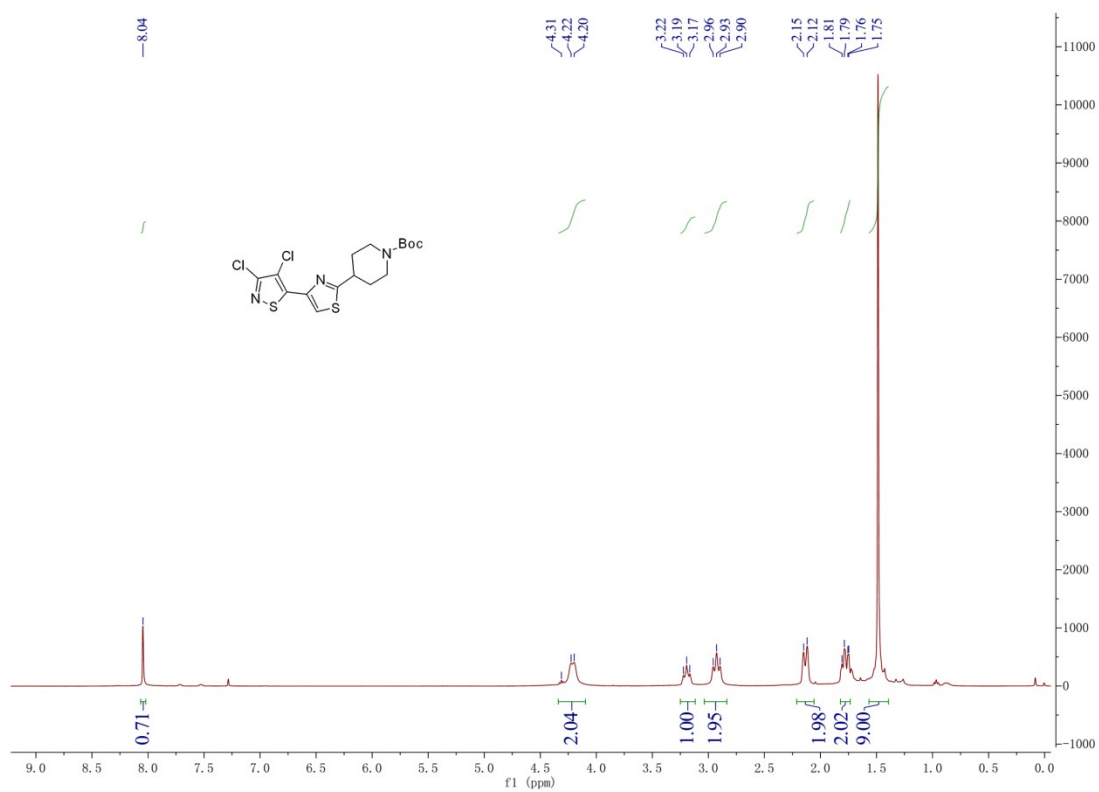

<sup>13</sup>C NMR (101 MHz, CDCl<sub>3</sub>) of compound **4**

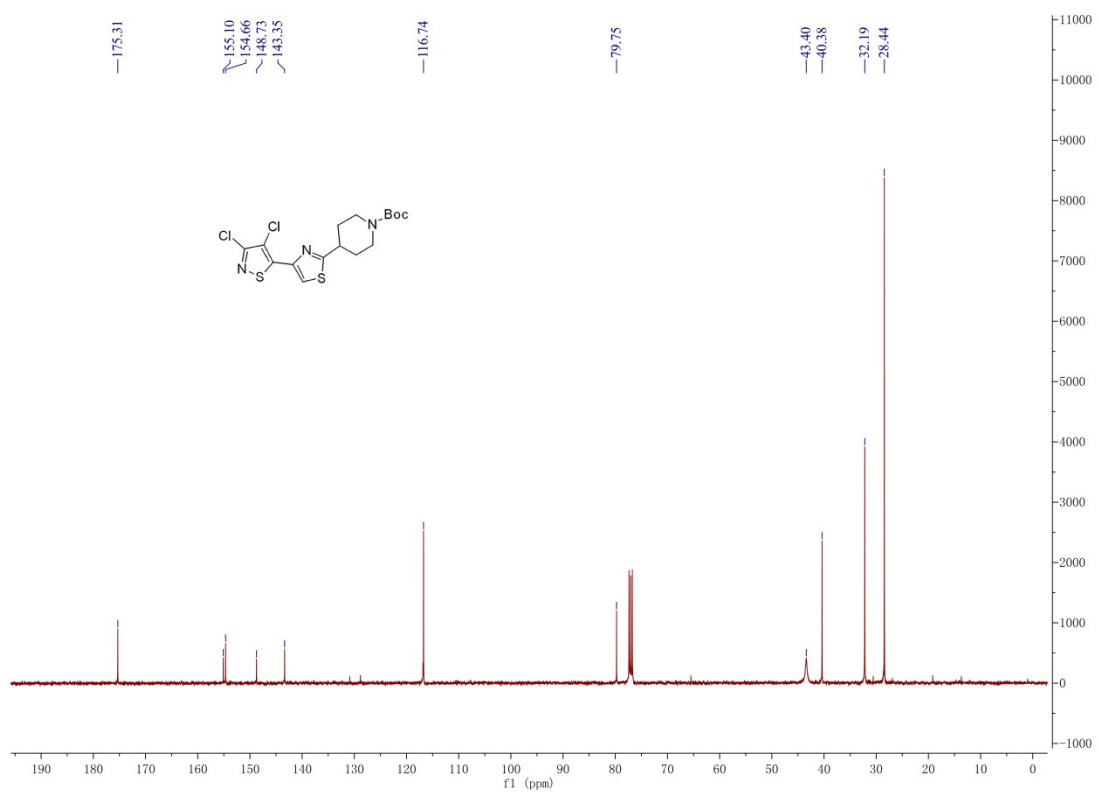

### $^1\text{H}$ NMR (400 MHz, $\text{CDCl}_3$ ) of compound **5**

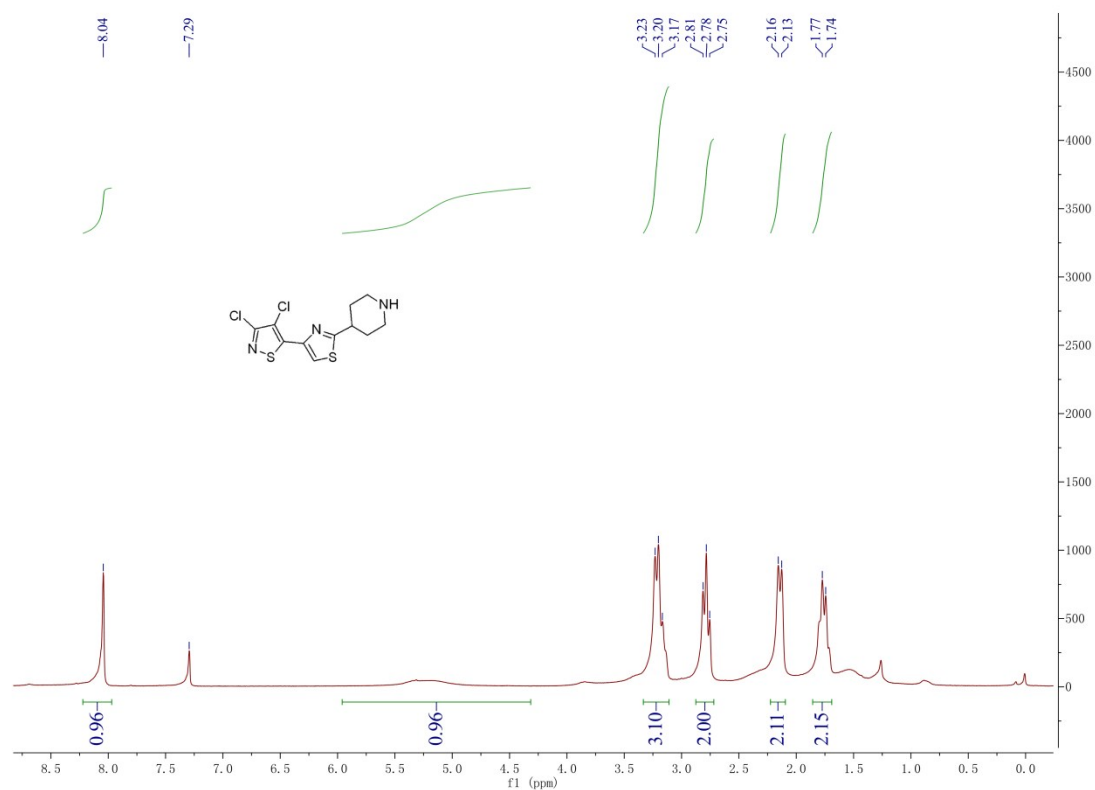

### $^{13}\text{C}$ NMR (101 MHz, $\text{CDCl}_3$ ) of compound **5**

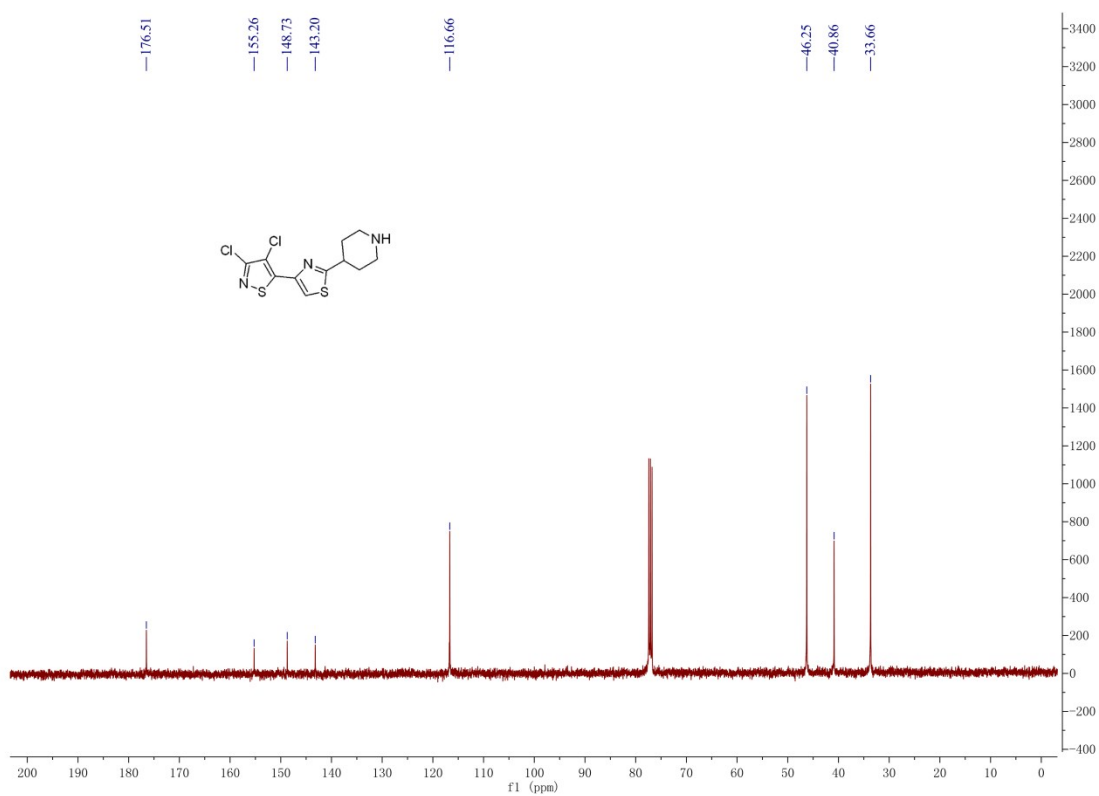

### <sup>1</sup>H NMR (400 MHz, CDCl<sub>3</sub>) of compound 6a

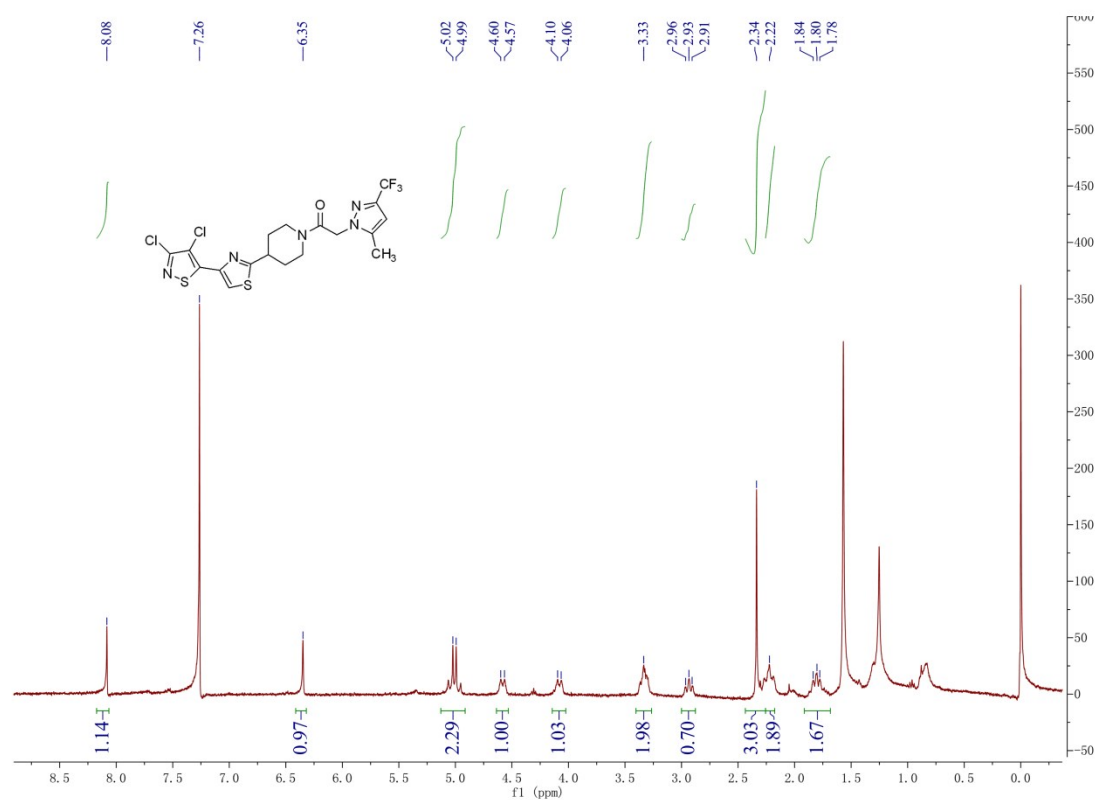

### <sup>13</sup>C NMR (101 MHz, DMSO) of compound 6a

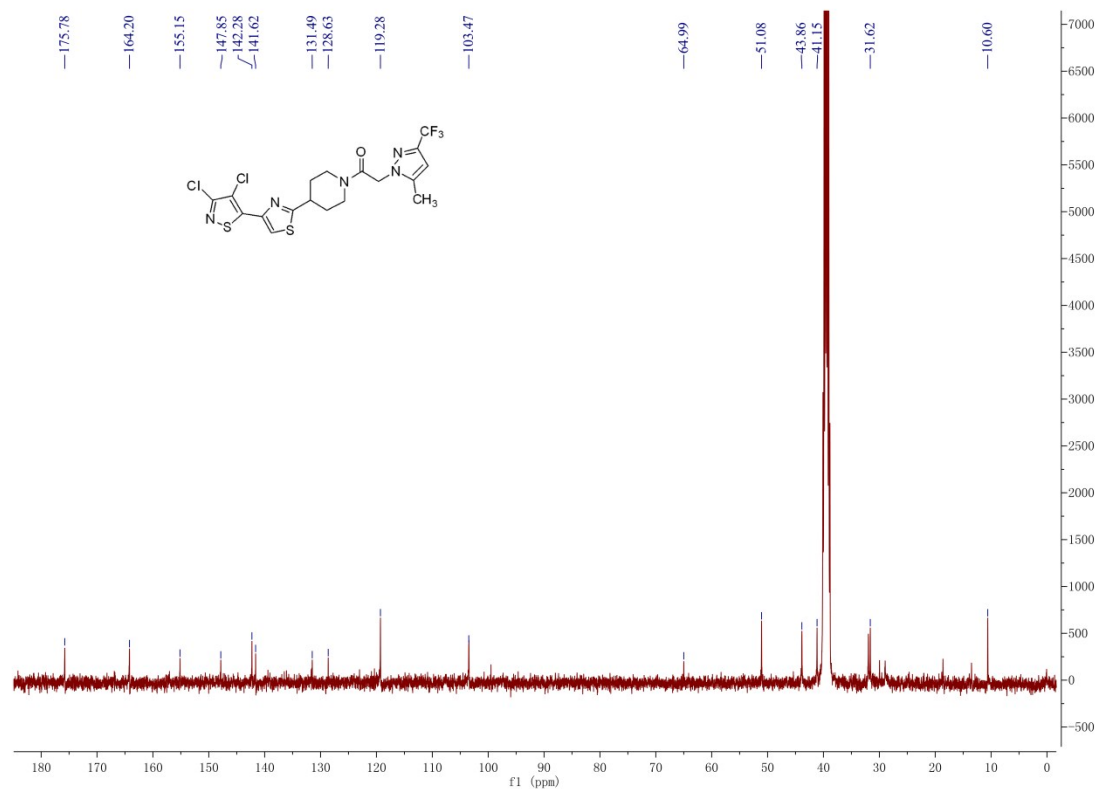



### $^1\text{H}$ NMR (400 MHz, $\text{CDCl}_3$ ) of compound **6b**

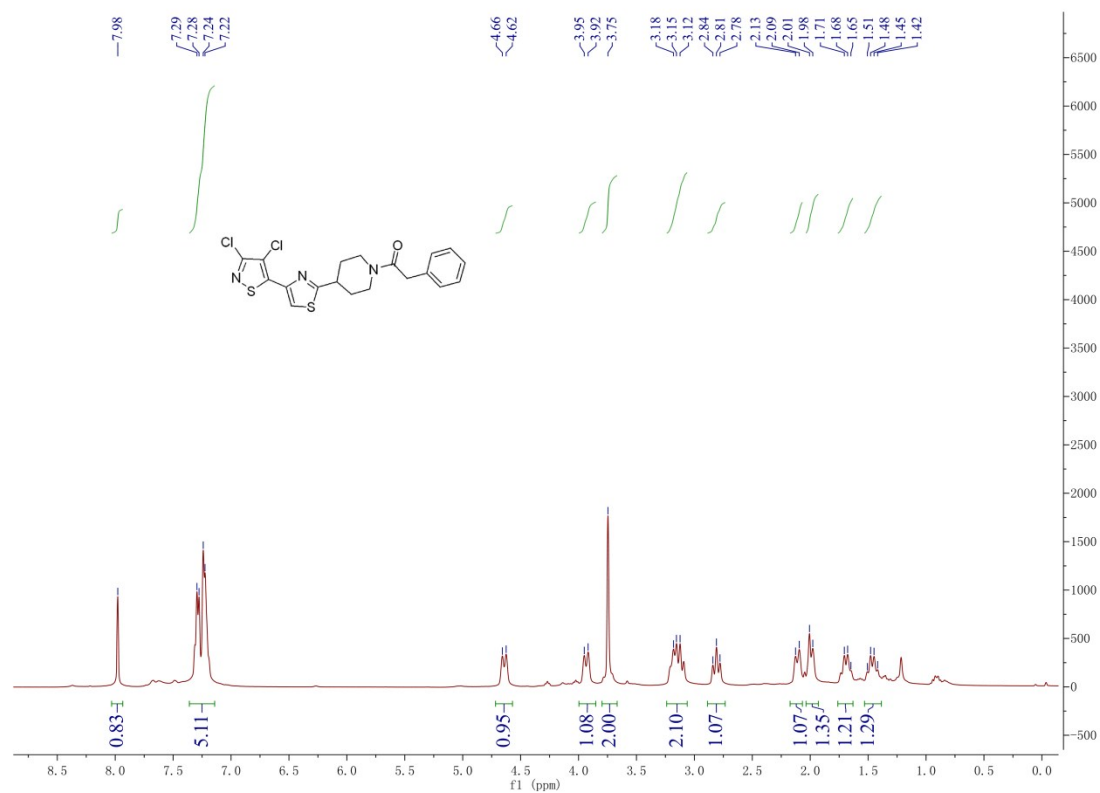

### $^{13}\text{C}$ NMR (101 MHz, $\text{CDCl}_3$ ) of compound **6b**

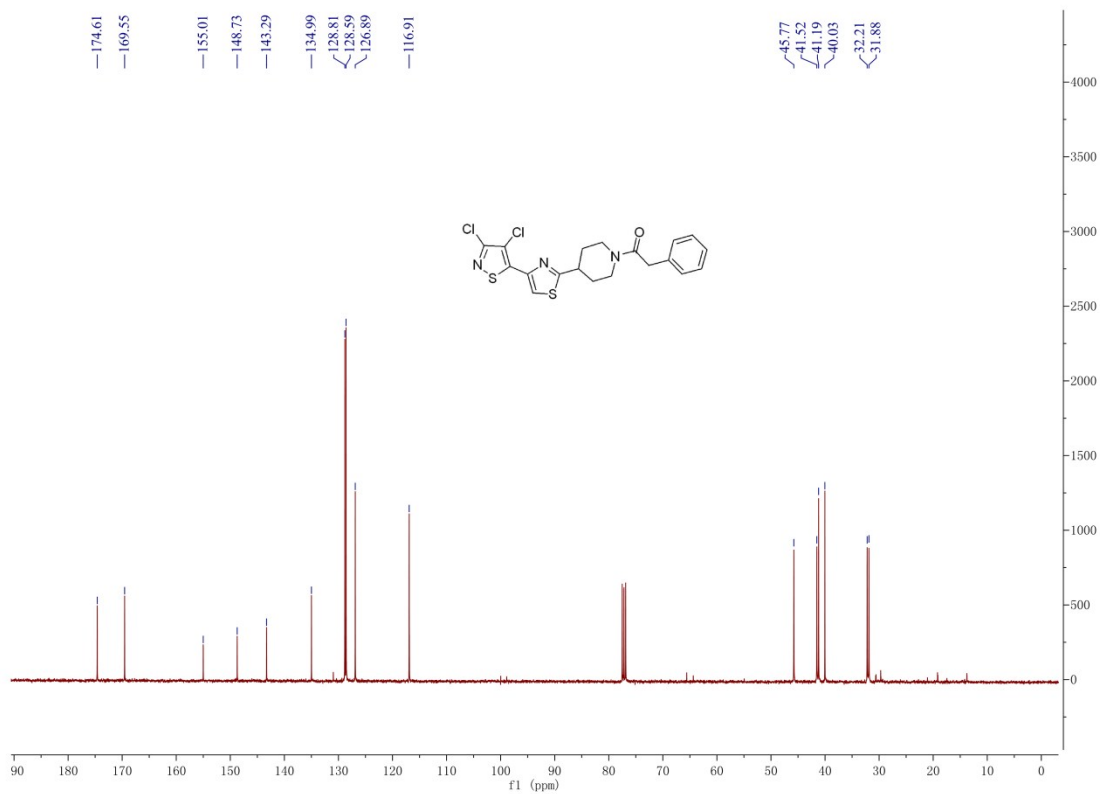

### $^1\text{H}$ NMR (400 MHz, $\text{CDCl}_3$ ) of compound **6c**

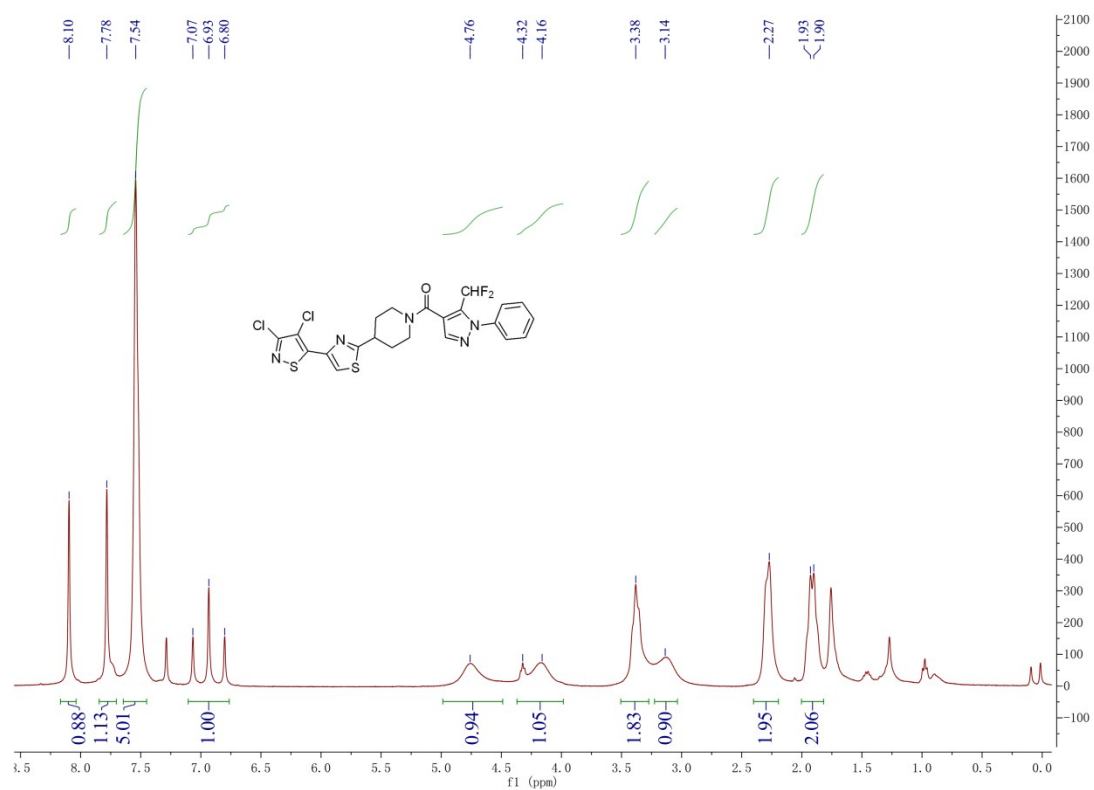

### $^{13}\text{C}$ NMR (101 MHz, $\text{CDCl}_3$ ) of compound **6c**

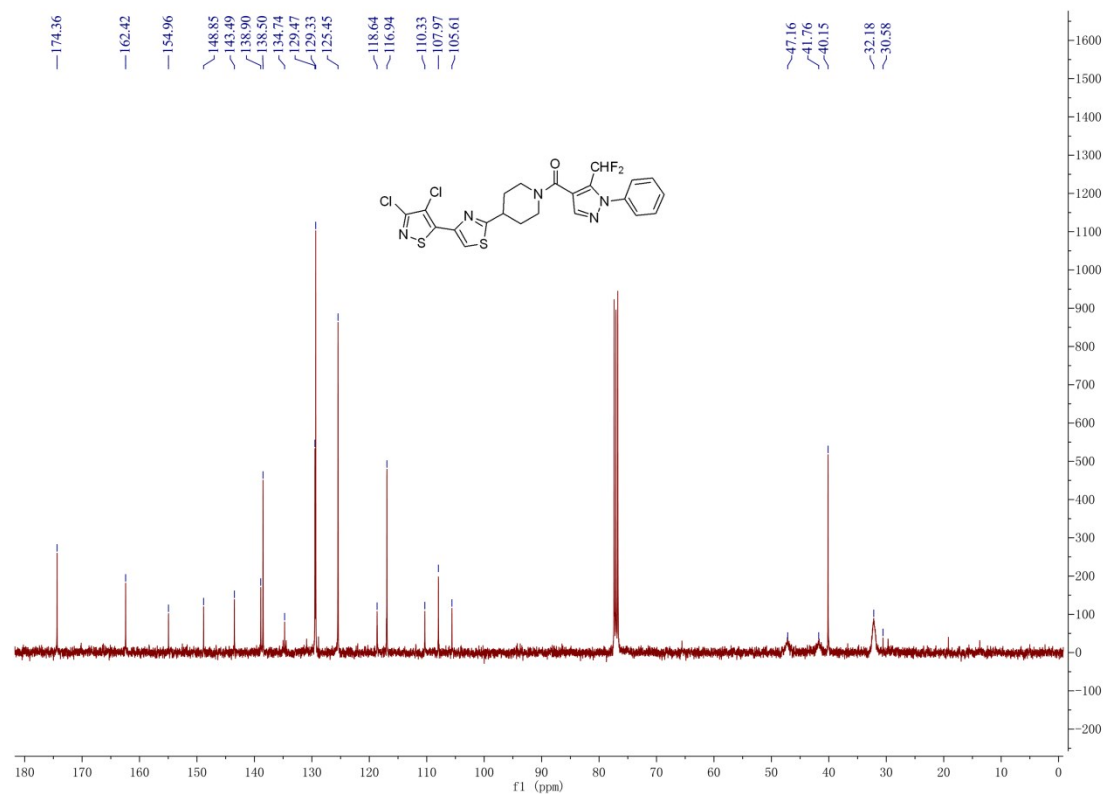

### $^1\text{H}$ NMR (400 MHz, $\text{CDCl}_3$ ) of compound **6d**

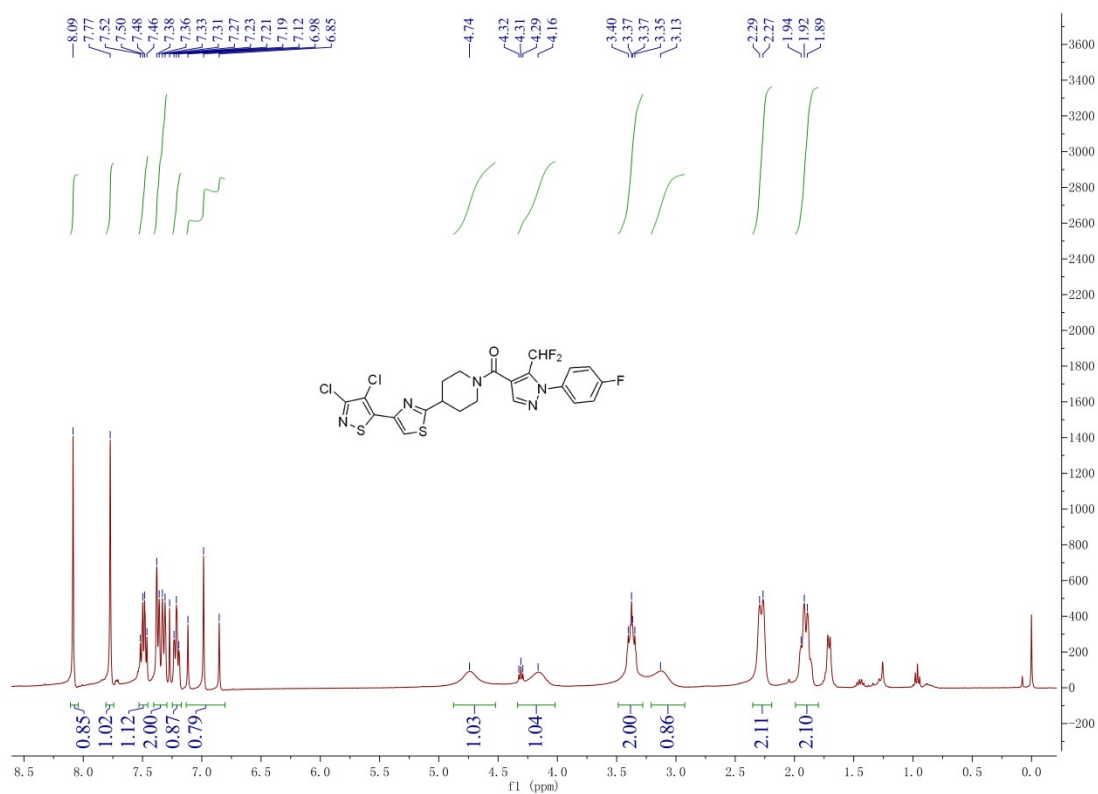

### $^{13}\text{C}$ NMR (101 MHz, $\text{CDCl}_3$ ) of compound **6d**

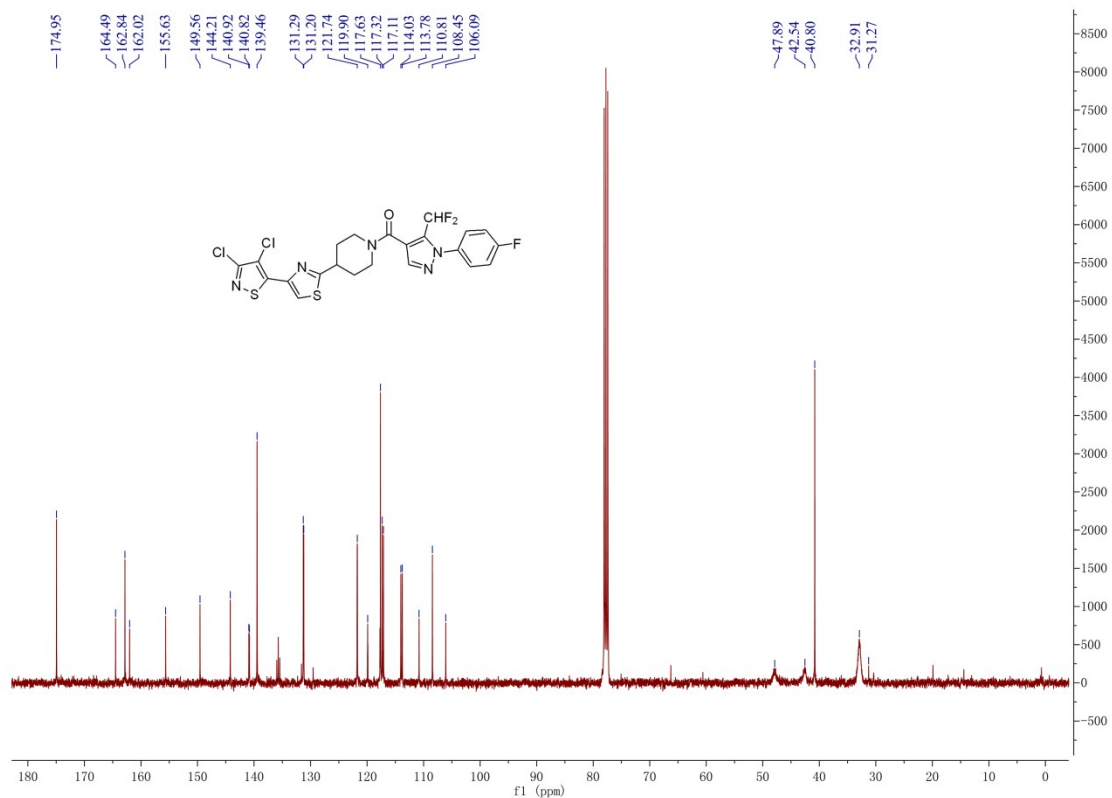

### $^1\text{H}$ NMR (400 MHz, $\text{CDCl}_3$ ) of compound **6e**

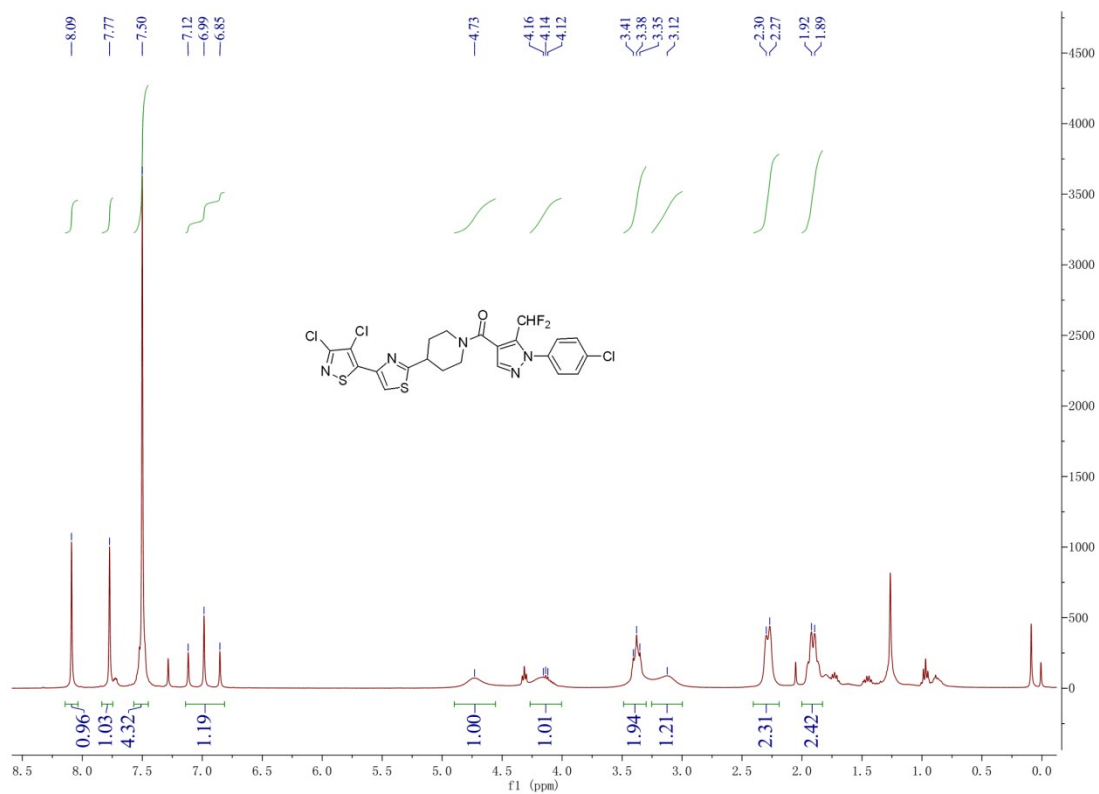

### $^{13}\text{C}$ NMR (101 MHz, $\text{CDCl}_3$ ) of compound **6e**

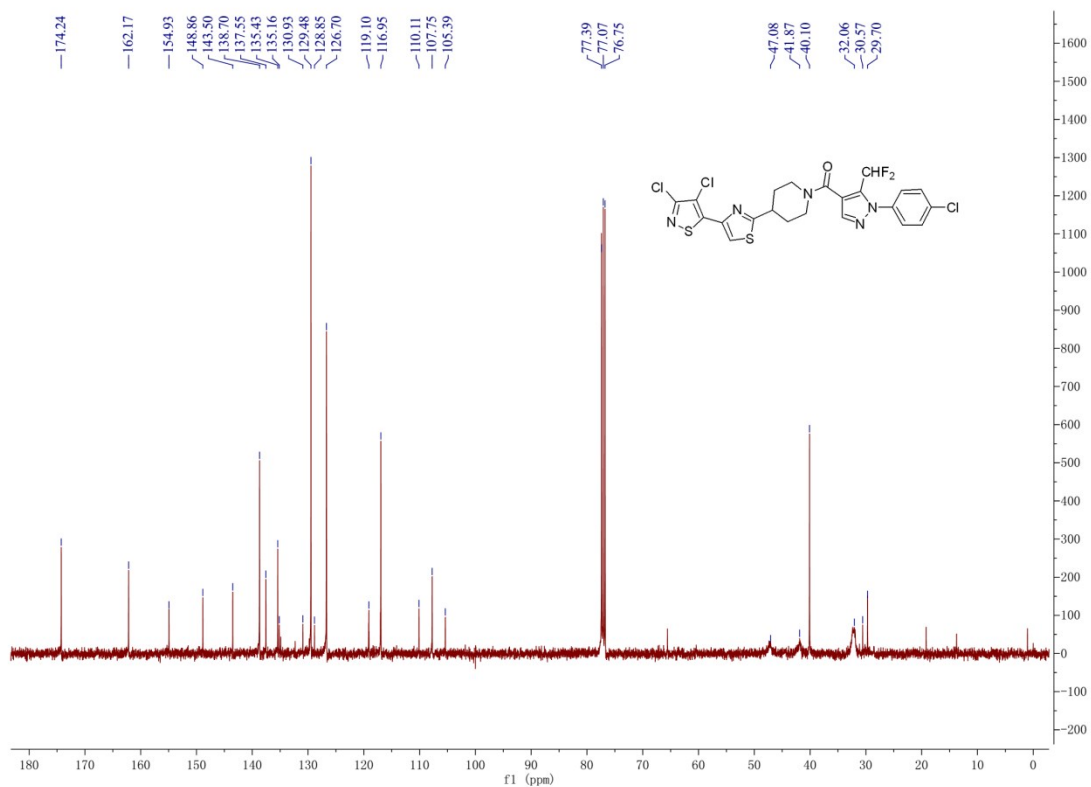

### $^1\text{H}$ NMR (400 MHz, $\text{CDCl}_3$ ) of compound **6f**

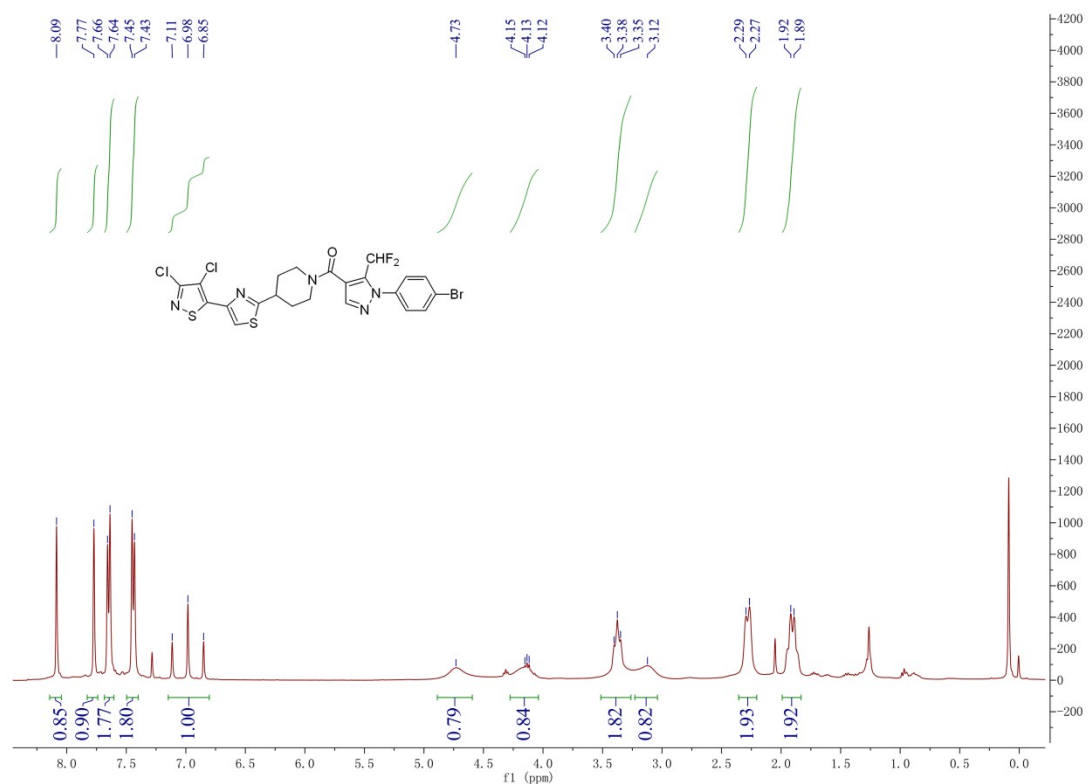

### $^{13}\text{C}$ NMR (101 MHz, $\text{CDCl}_3$ ) of compound **6f**

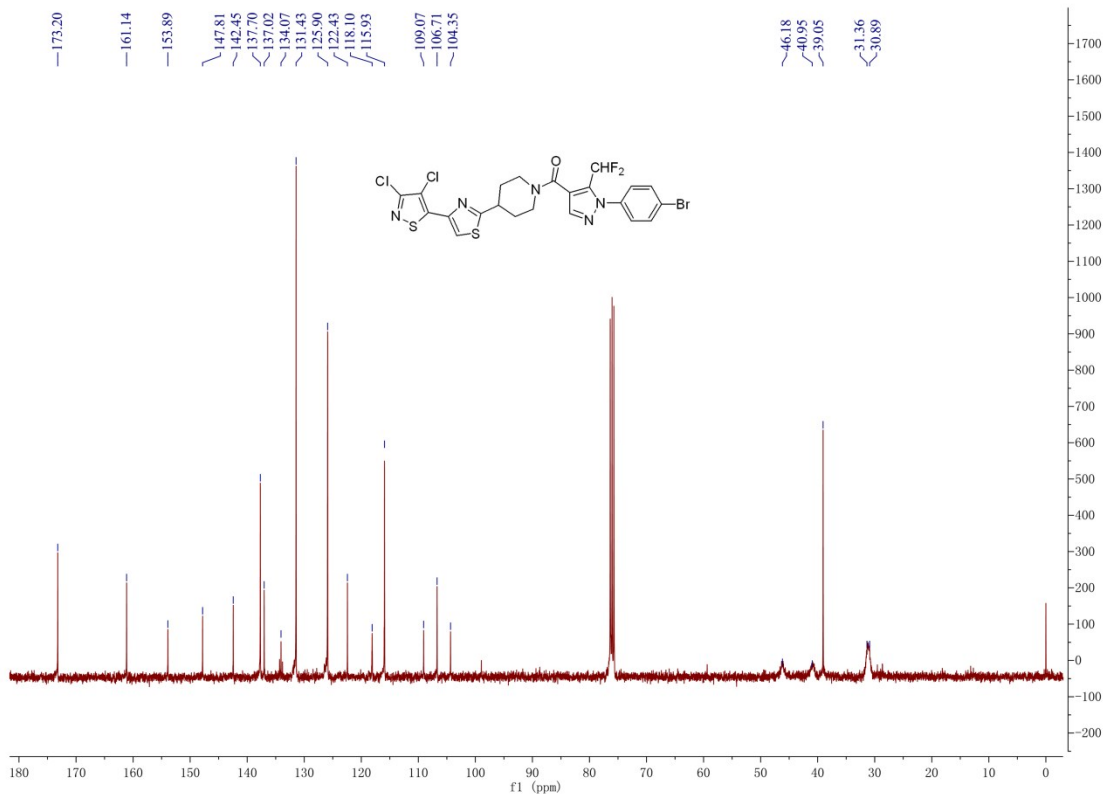

<sup>1</sup>H NMR (400 MHz, CDCl<sub>3</sub>) of compound **6g**

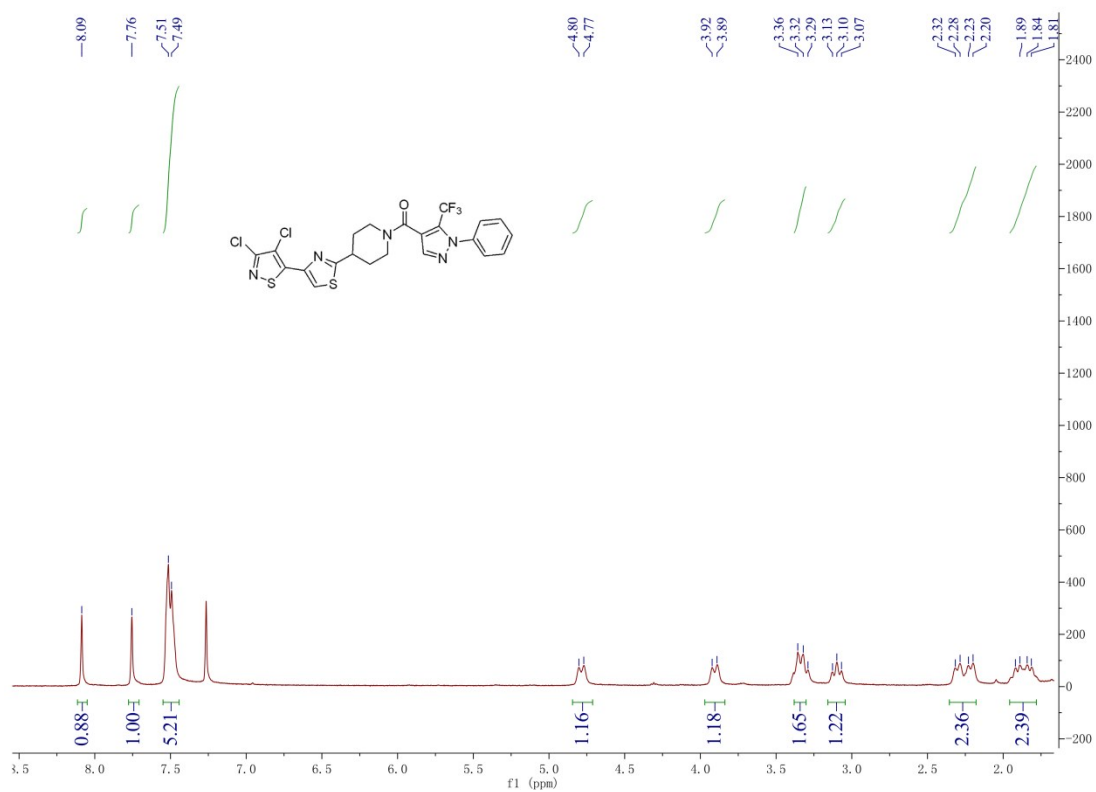

<sup>13</sup>C NMR (101 MHz, CDCl<sub>3</sub>) of compound **6g**

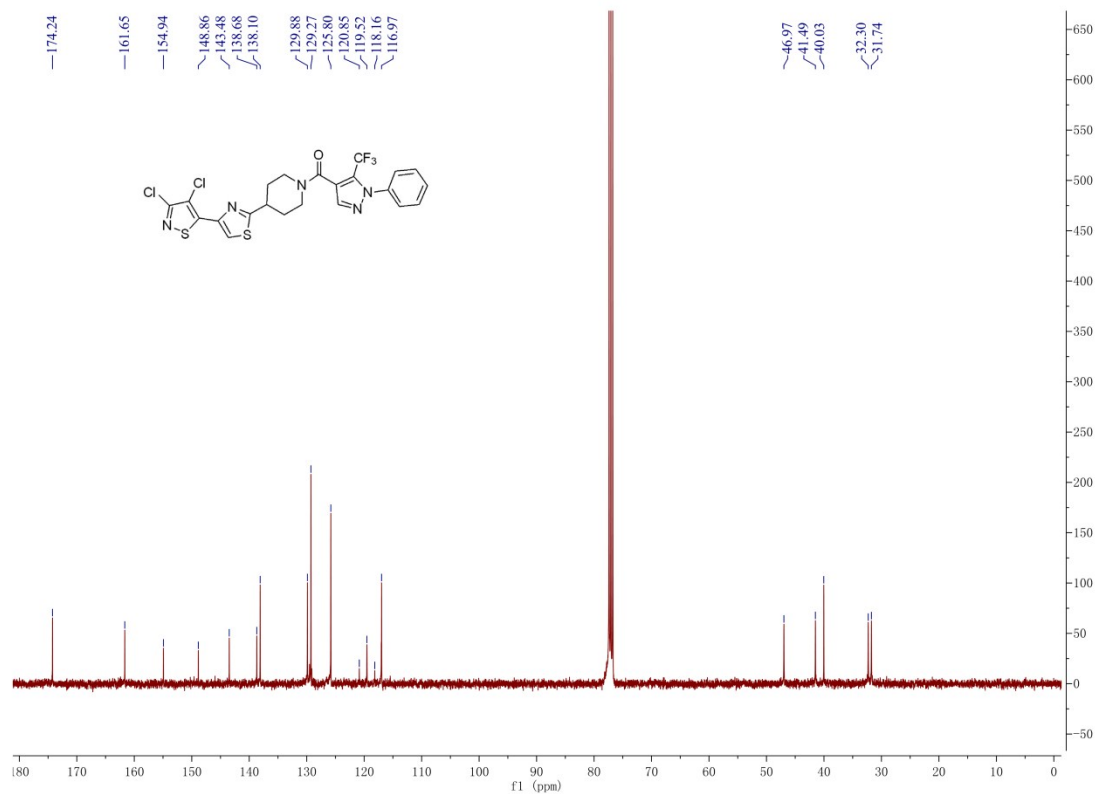

### $^1\text{H}$ NMR (400 MHz, $\text{CDCl}_3$ ) of compound **6h**

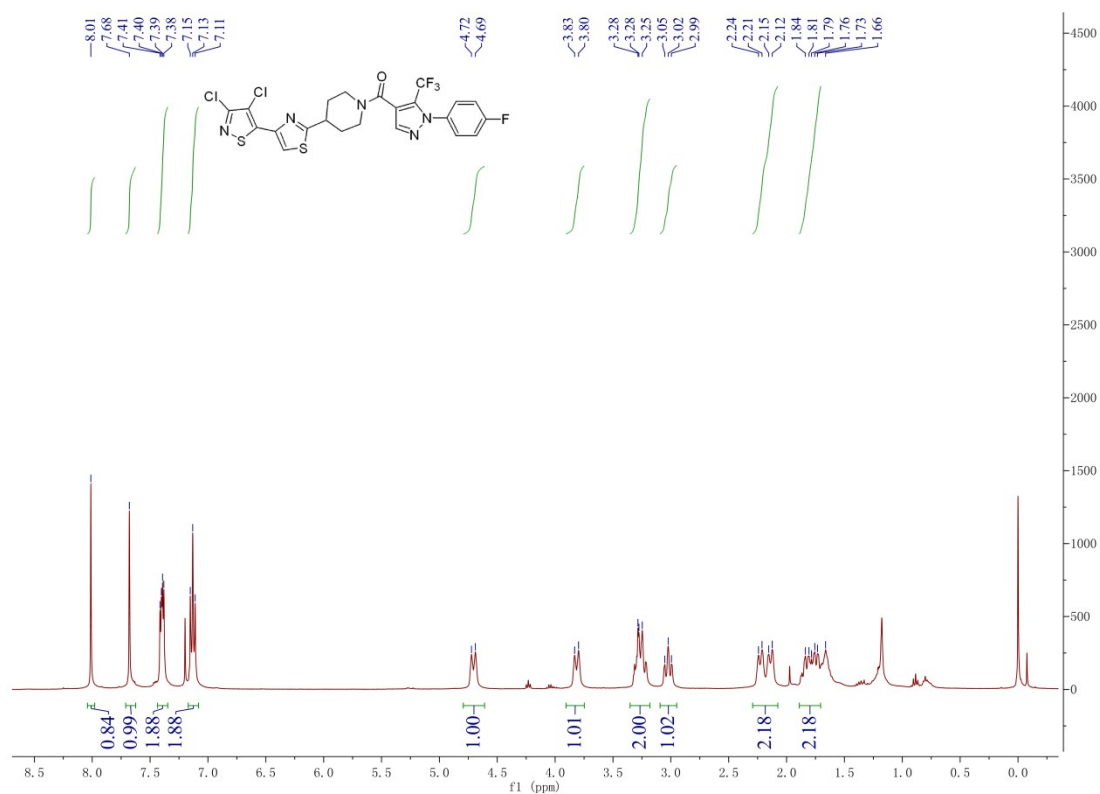

### $^{13}\text{C}$ NMR (101 MHz, $\text{CDCl}_3$ ) of compound **6h**

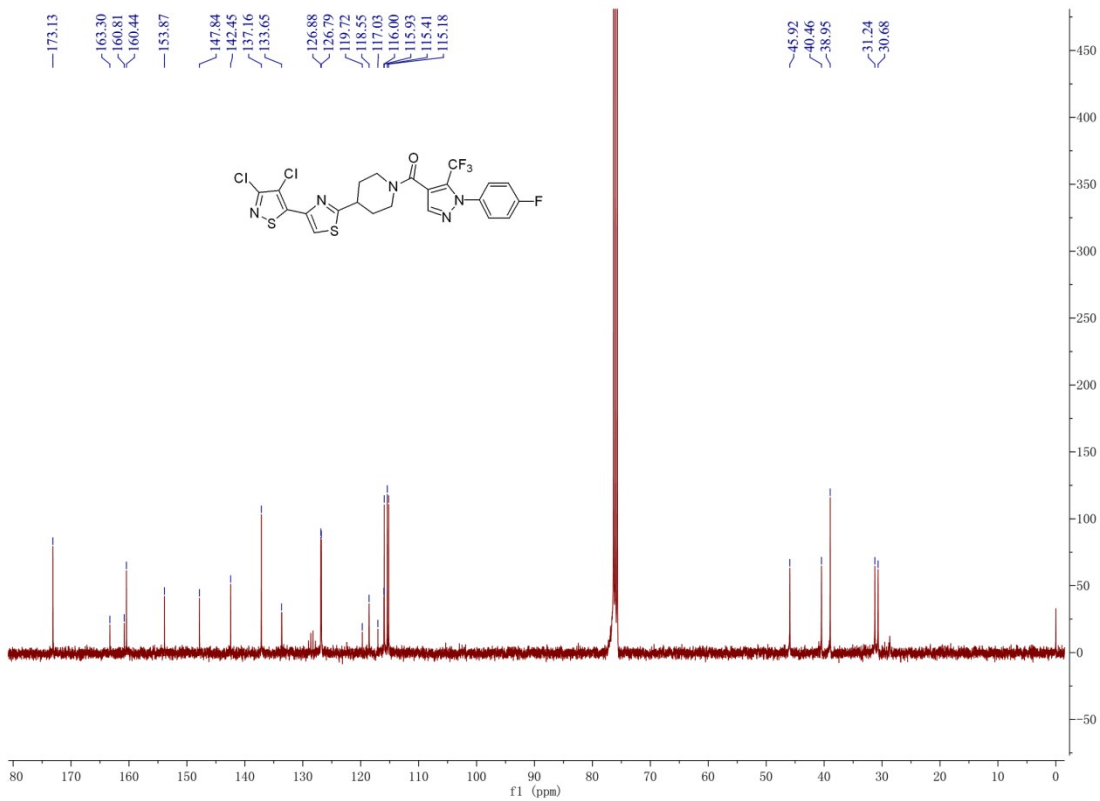

### $^1\text{H}$ NMR (400 MHz, $\text{CDCl}_3$ ) of compound **6i**

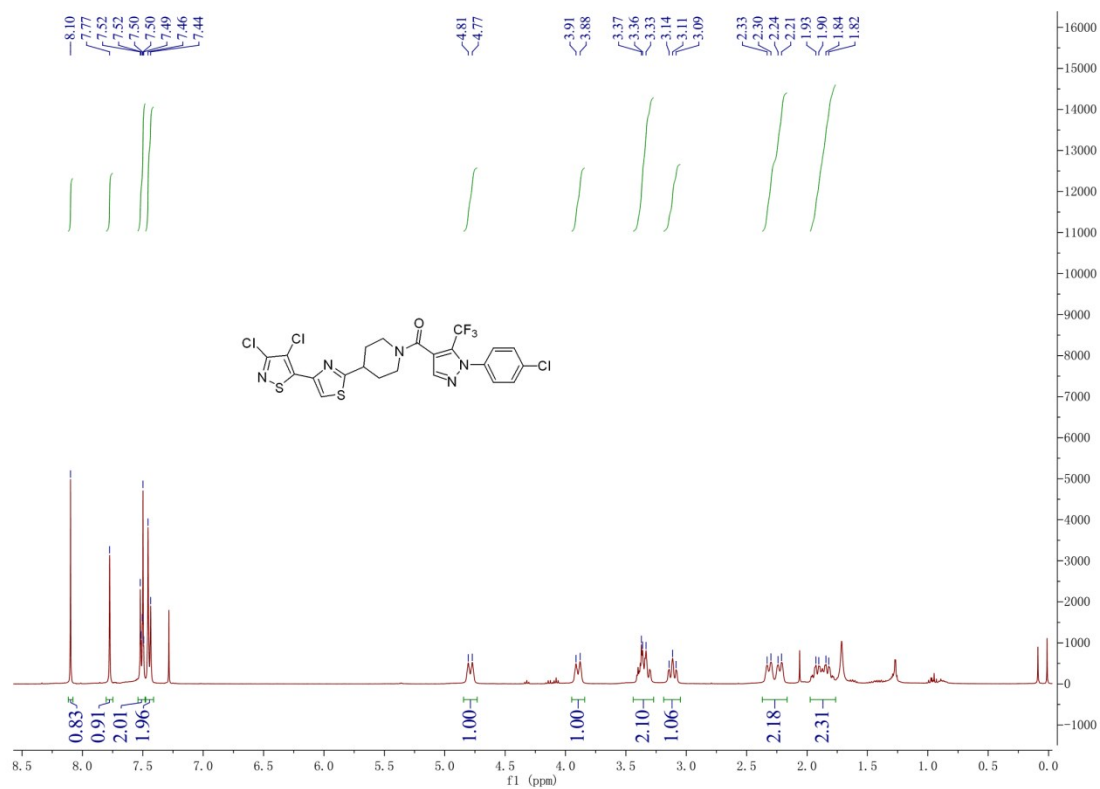

### $^{13}\text{C}$ NMR (101 MHz, $\text{CDCl}_3$ ) of compound **6i**

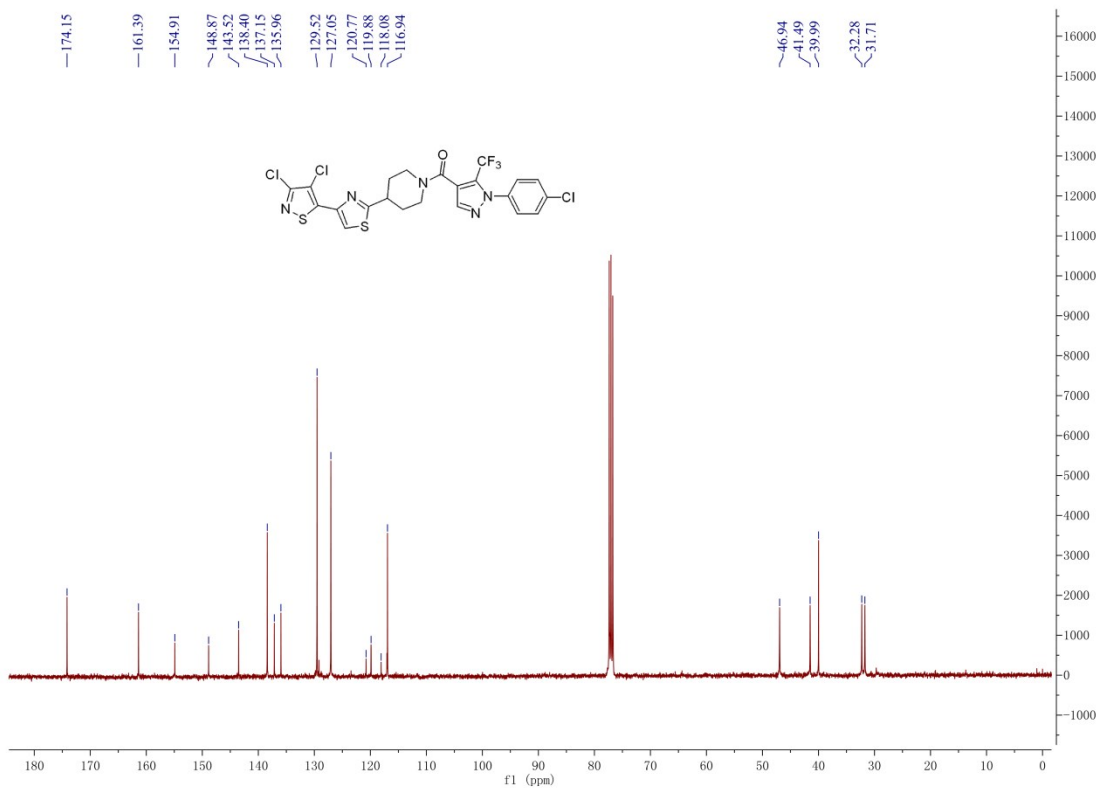



### $^1\text{H}$ NMR (400 MHz, $\text{CDCl}_3$ ) of compound **6j**

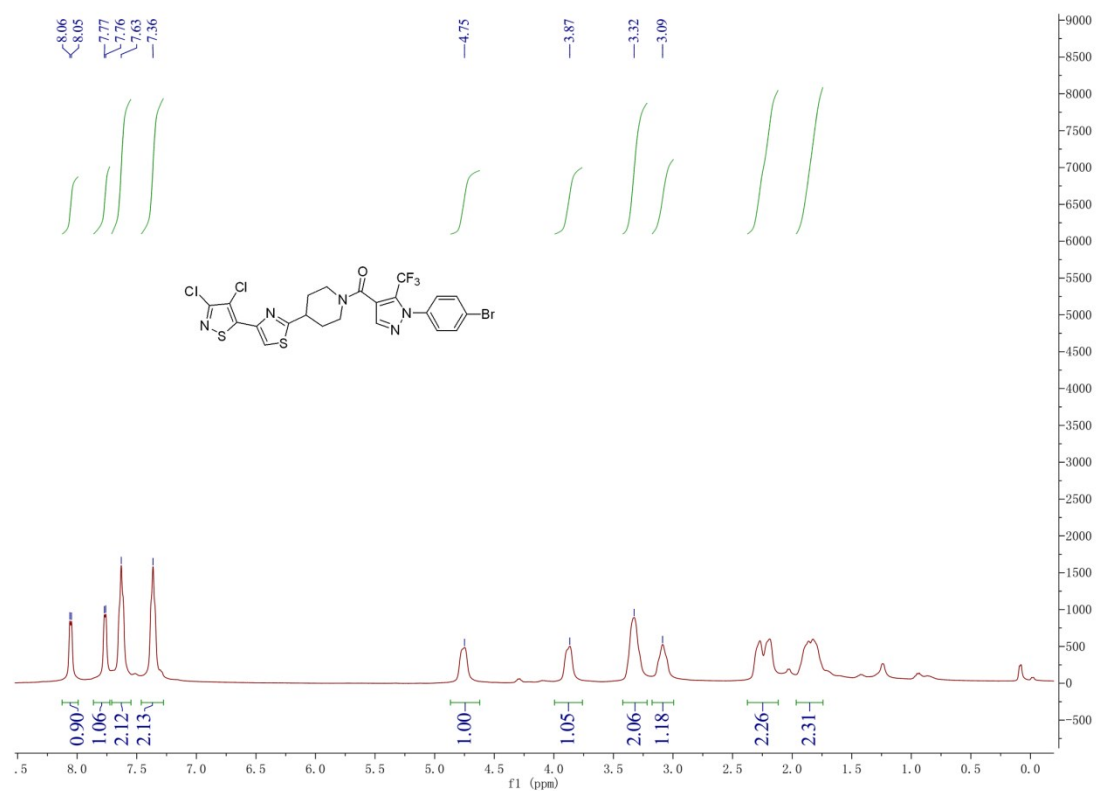

### $^{13}\text{C}$ NMR (101 MHz, $\text{CDCl}_3$ ) of compound **6j**

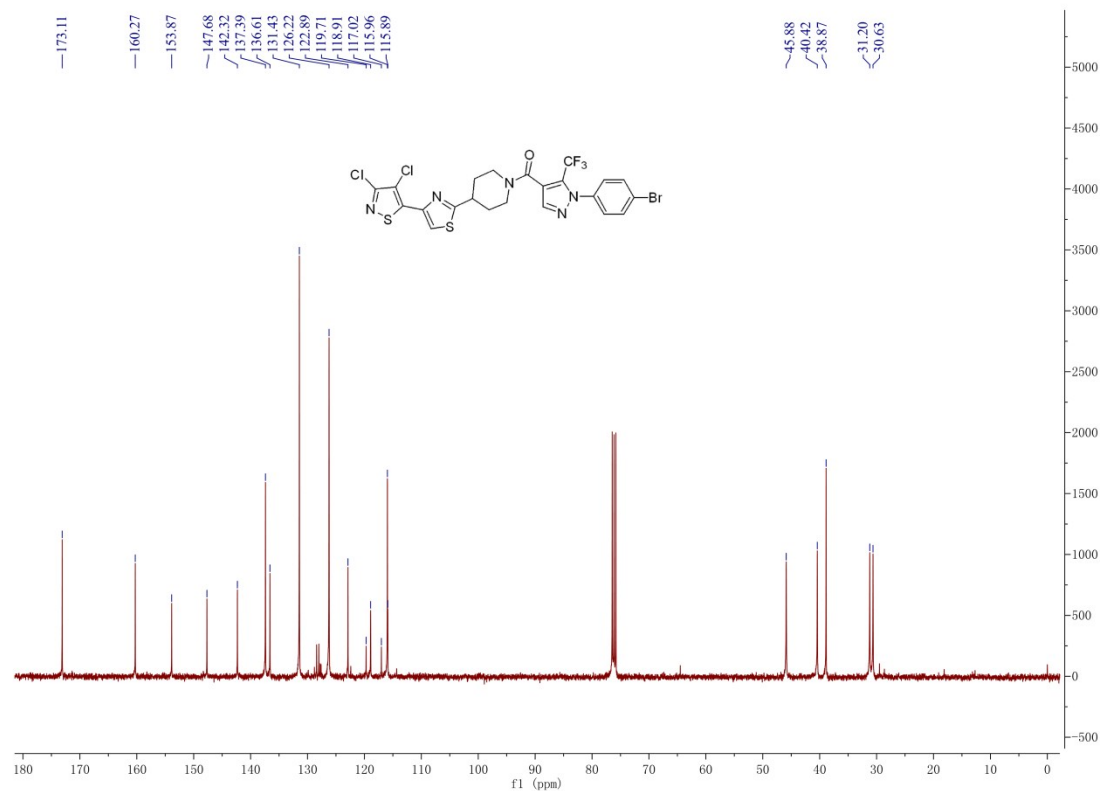

### $^1\text{H}$ NMR (400 MHz, $\text{CDCl}_3$ ) of compound **6k**

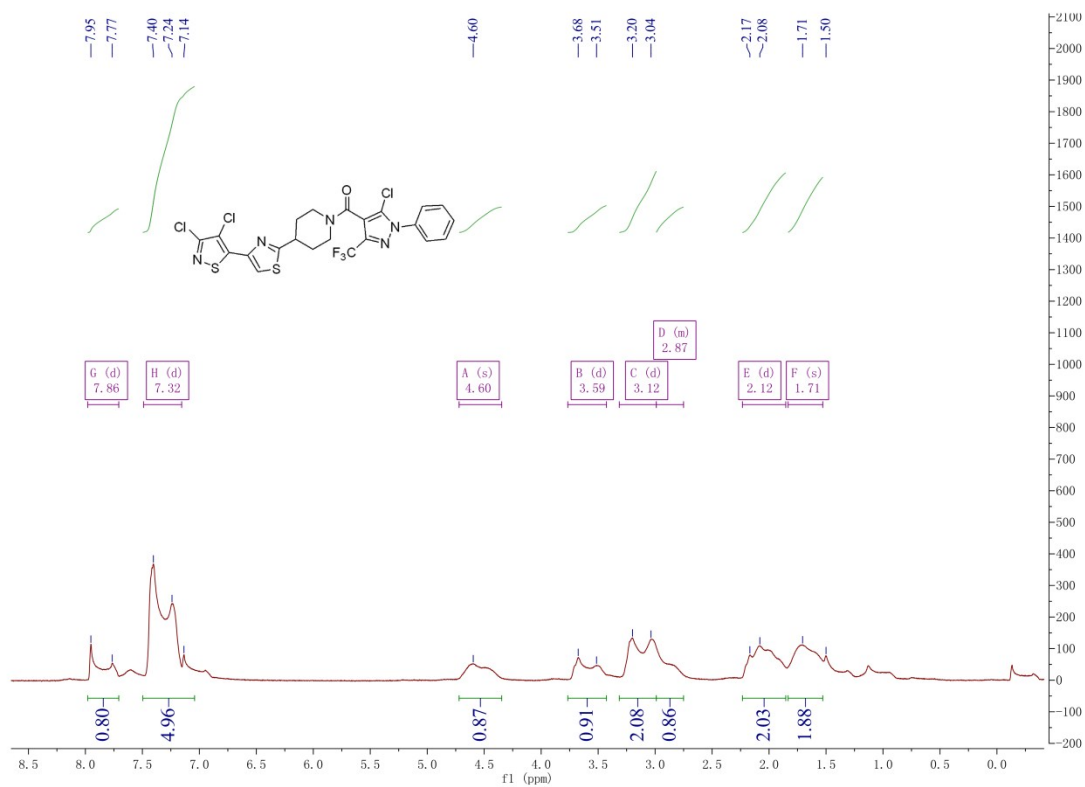

### $^{13}\text{C}$ NMR (101 MHz, $\text{CDCl}_3$ ) of compound **6k**

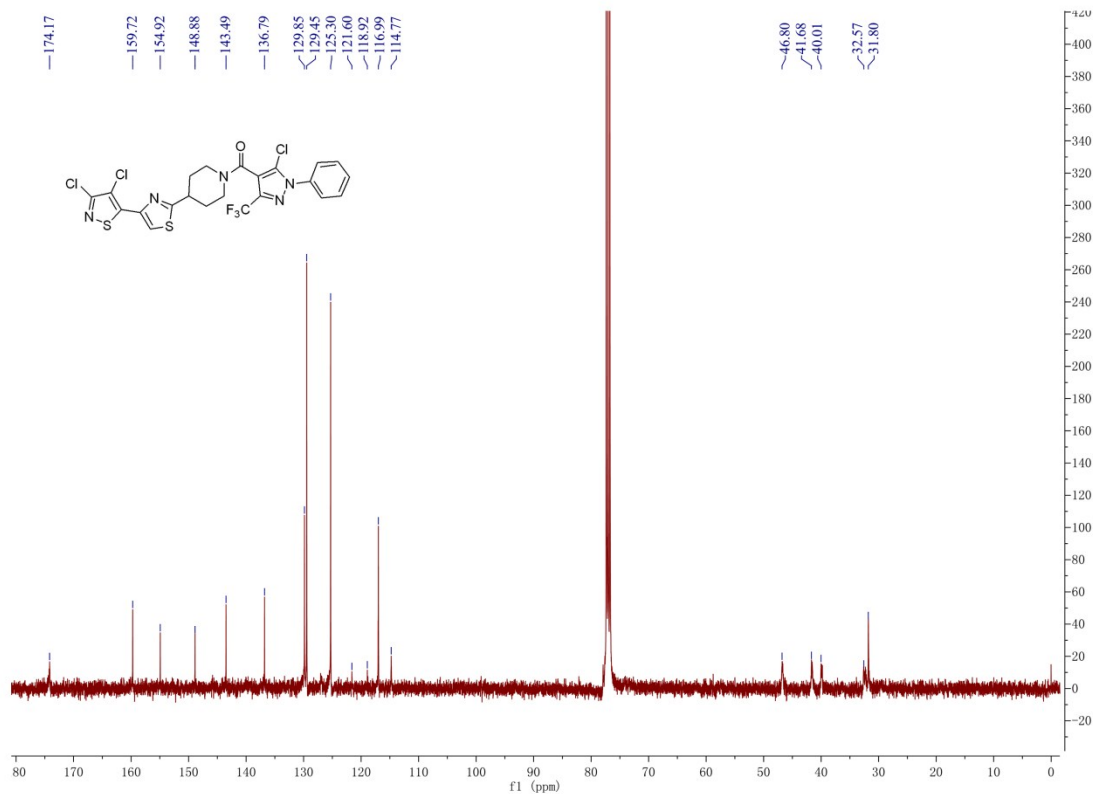

### $^1\text{H}$ NMR (400 MHz, $\text{CDCl}_3$ ) of compound **61**

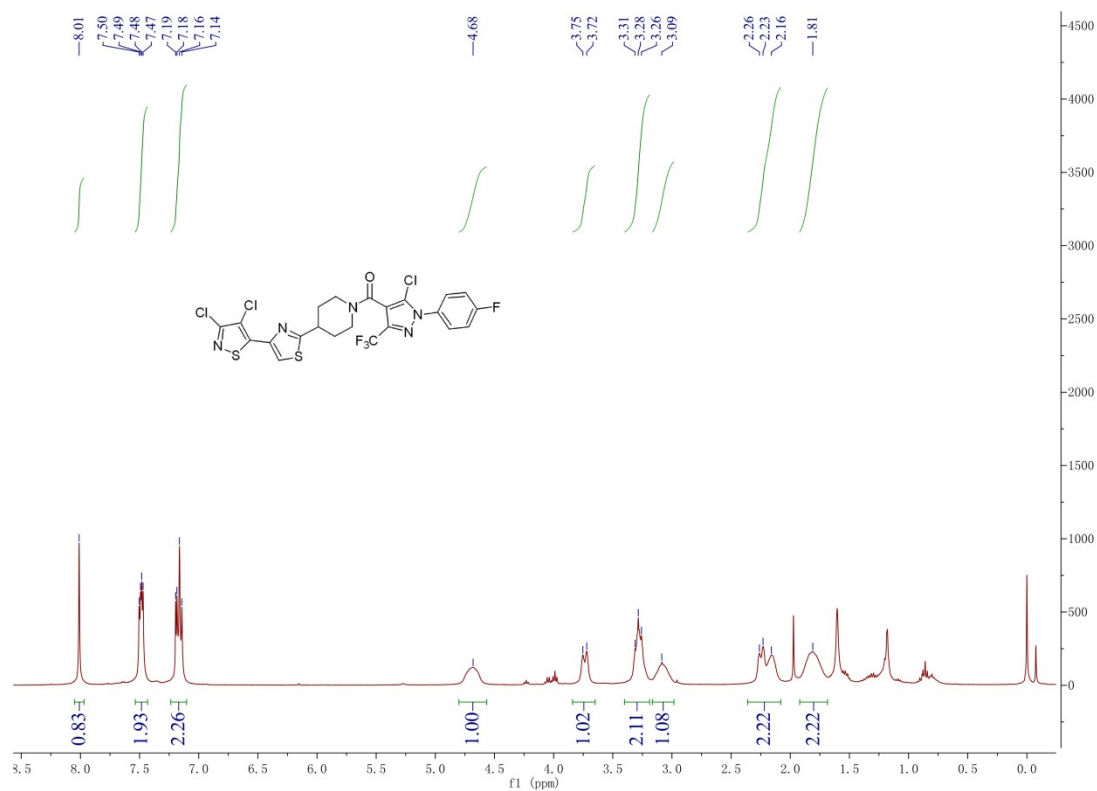

### $^{13}\text{C}$ NMR (101 MHz, $\text{CDCl}_3$ ) of compound **61**

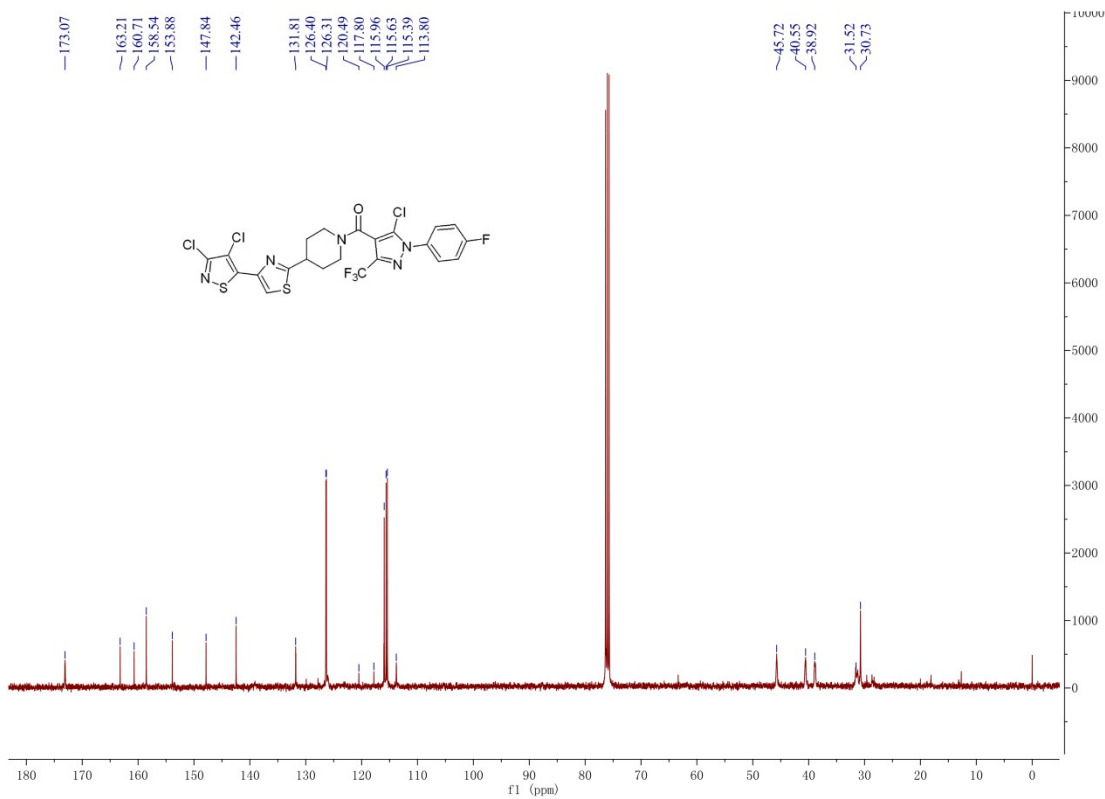

### $^1\text{H}$ NMR (400 MHz, $\text{CDCl}_3$ ) of compound **6m**

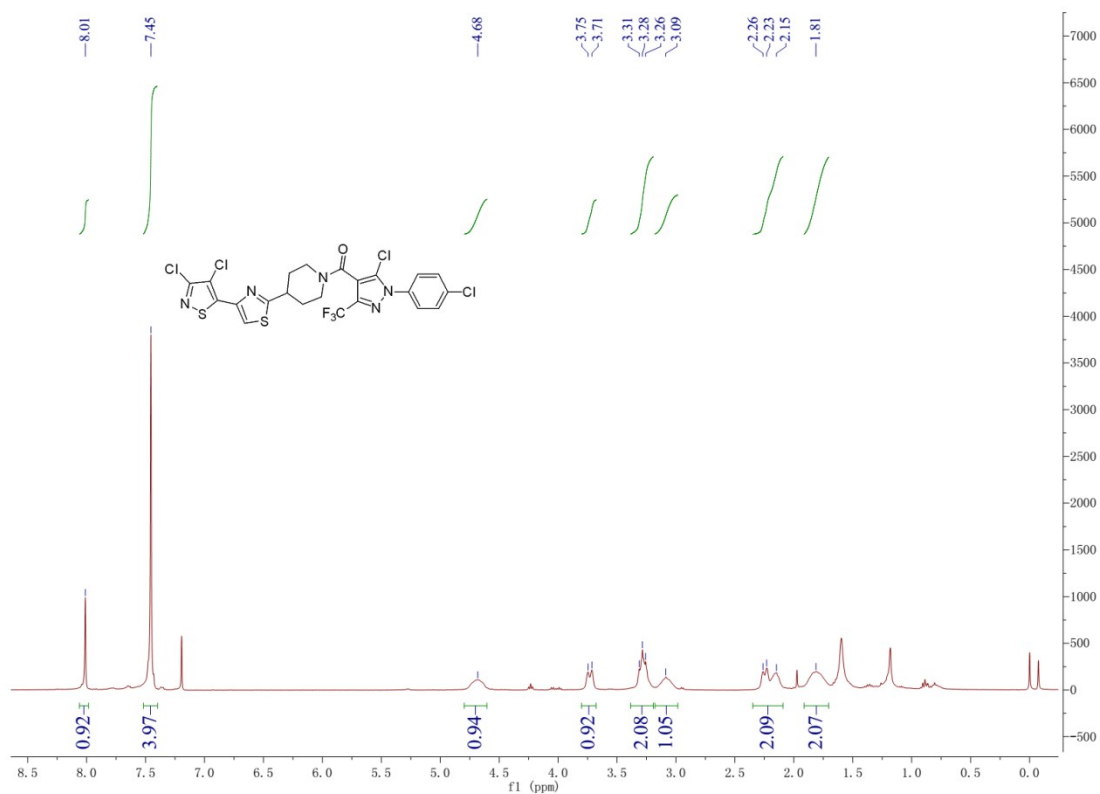

### $^{13}\text{C}$ NMR (101 MHz, $\text{CDCl}_3$ ) of compound **6m**

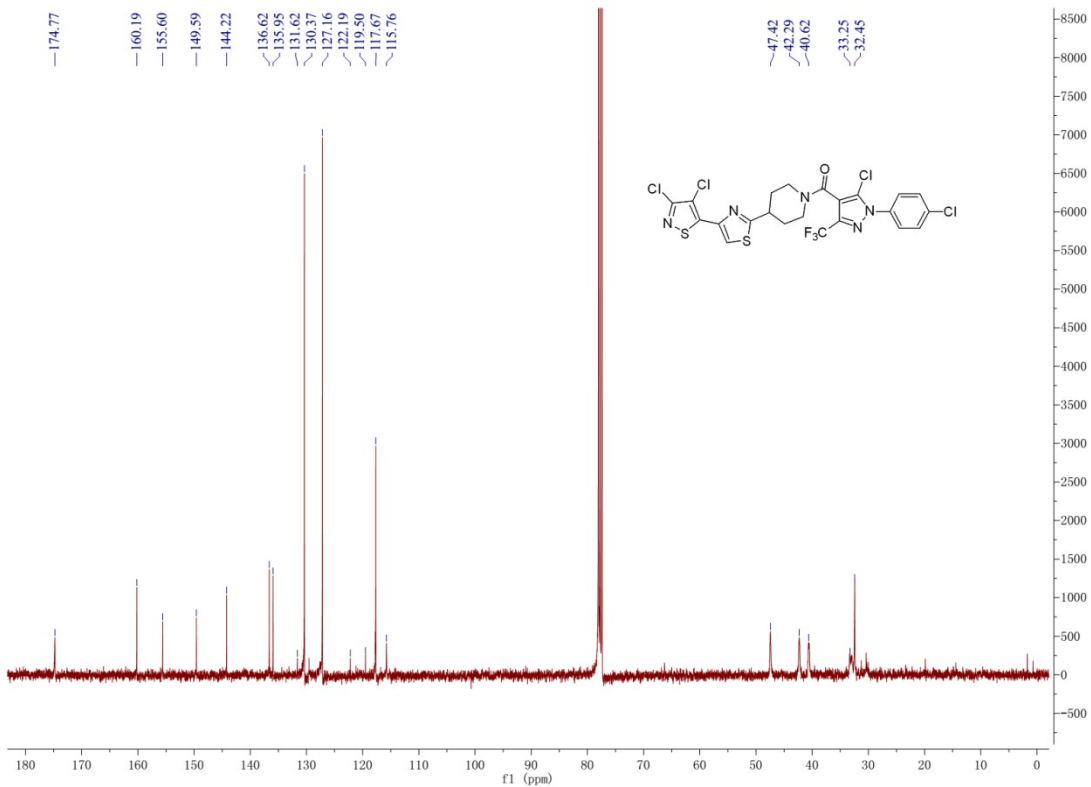

<sup>1</sup>H NMR (400 MHz, CDCl<sub>3</sub>) of compound **6n**

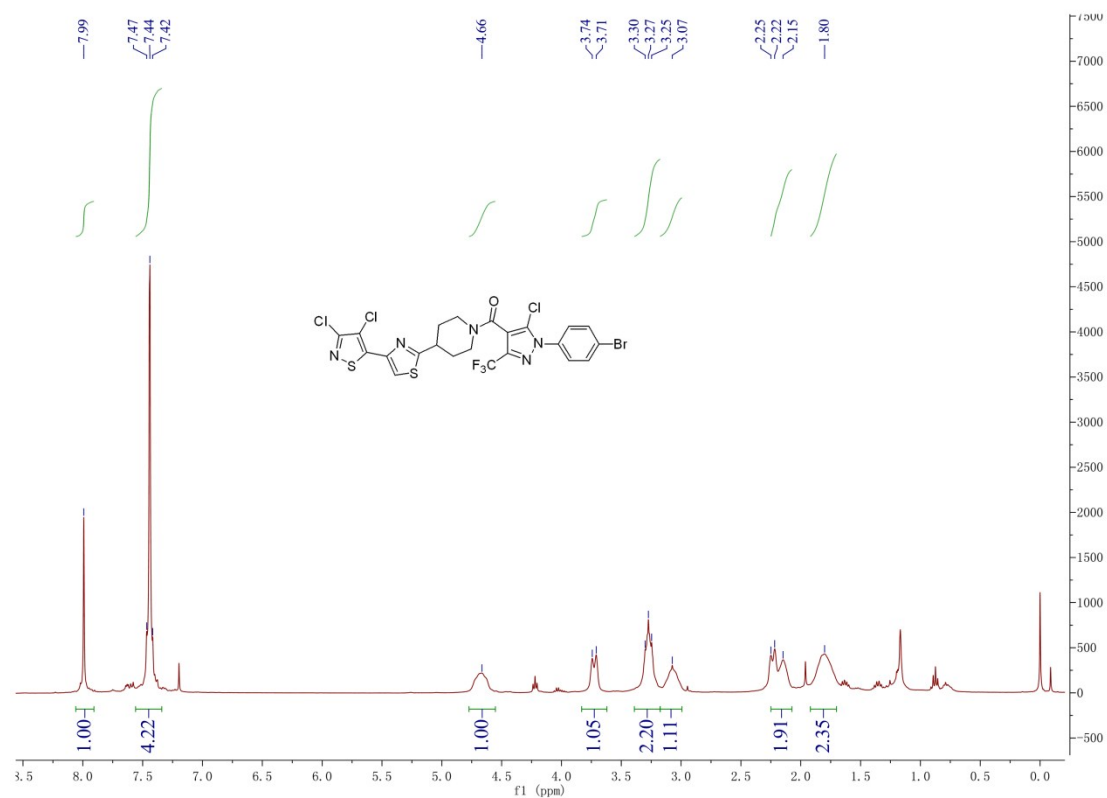

<sup>13</sup>C NMR (101 MHz, CDCl<sub>3</sub>) of compound **6n**

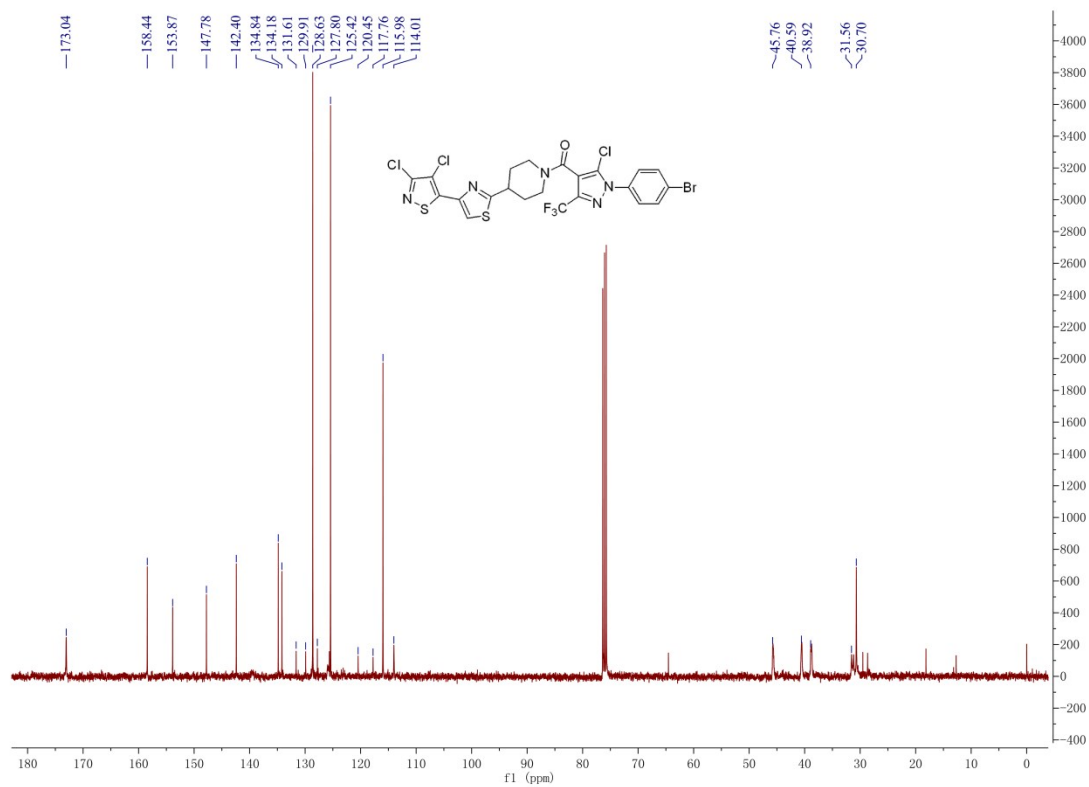

<sup>1</sup>H NMR (400 MHz, CDCl<sub>3</sub>) of compound **6o**

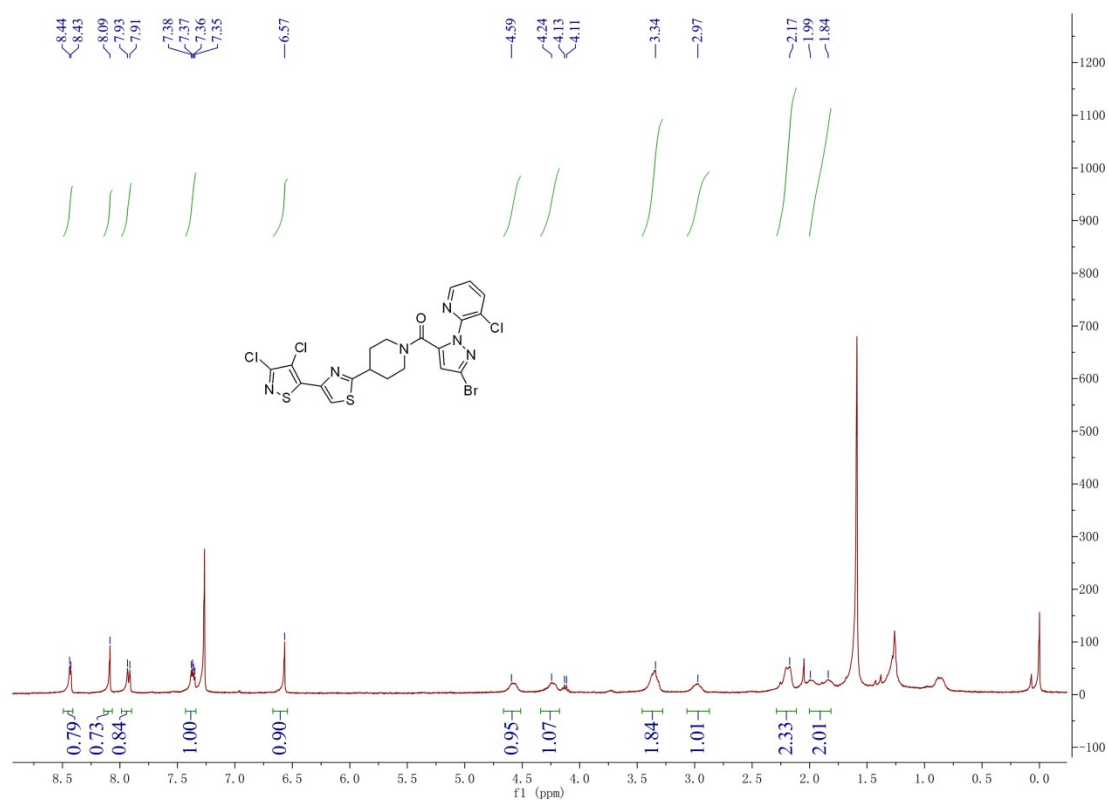

<sup>13</sup>C NMR (101 MHz, CDCl<sub>3</sub>) of compound **6o**

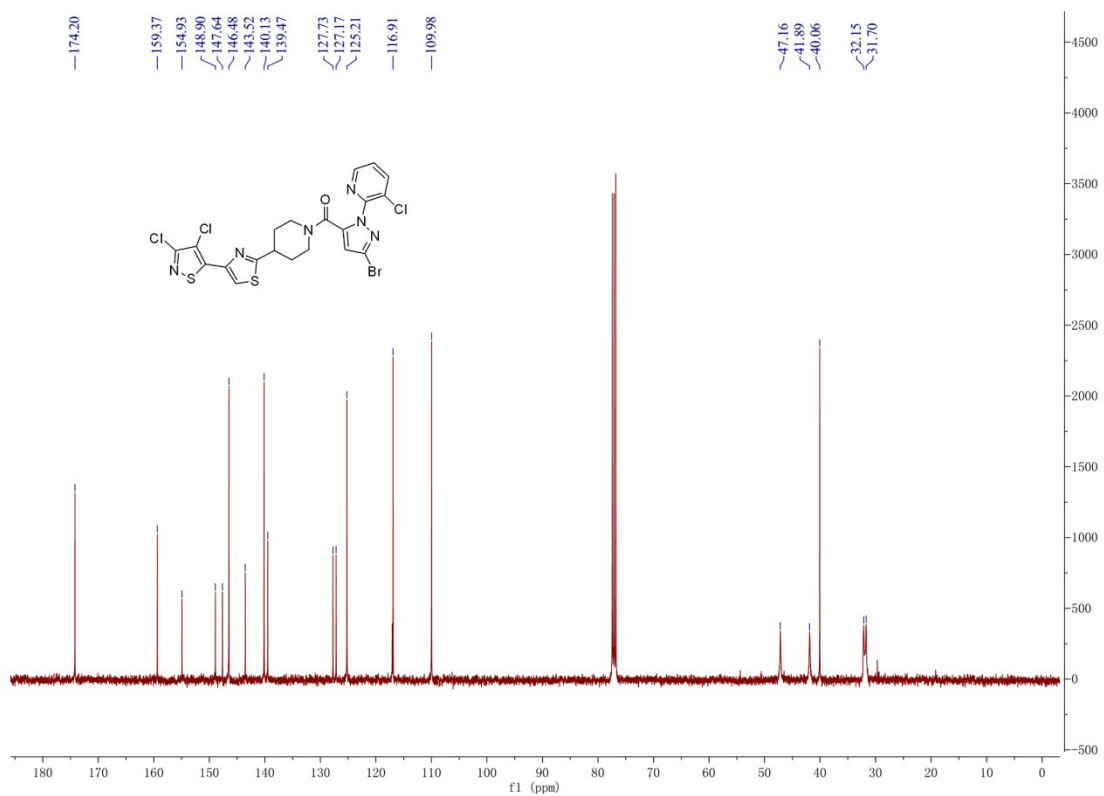

$^1\text{H}$  NMR (400 MHz,  $\text{CDCl}_3$ ) of compound **6p**

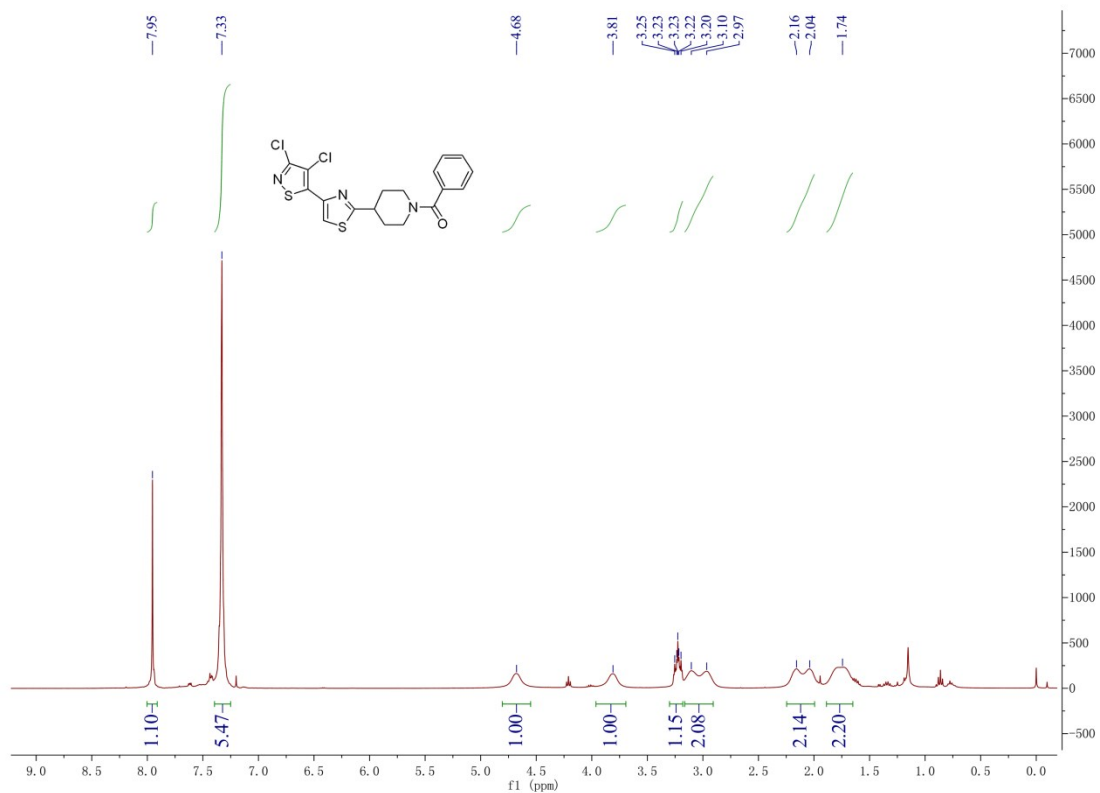

$^{13}\text{C}$  NMR (101 MHz,  $\text{CDCl}_3$ ) of compound **6p**

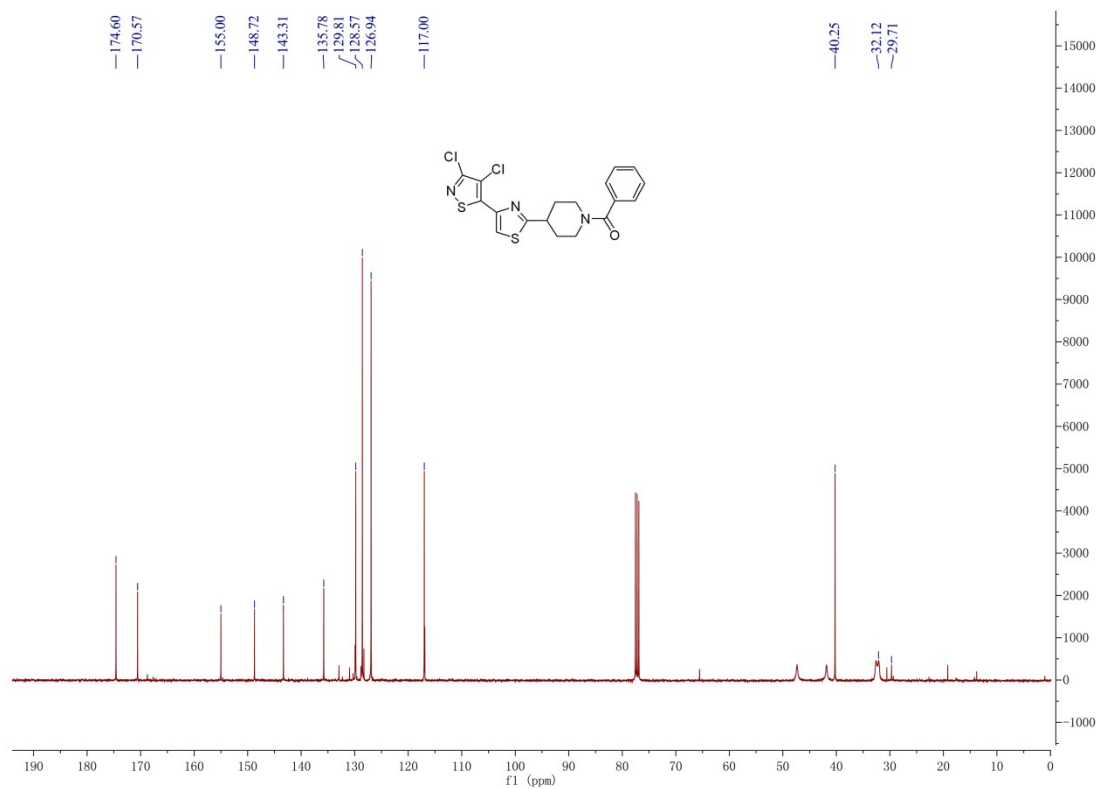

<sup>1</sup>H NMR (400 MHz, CDCl<sub>3</sub>) of compound **6q**

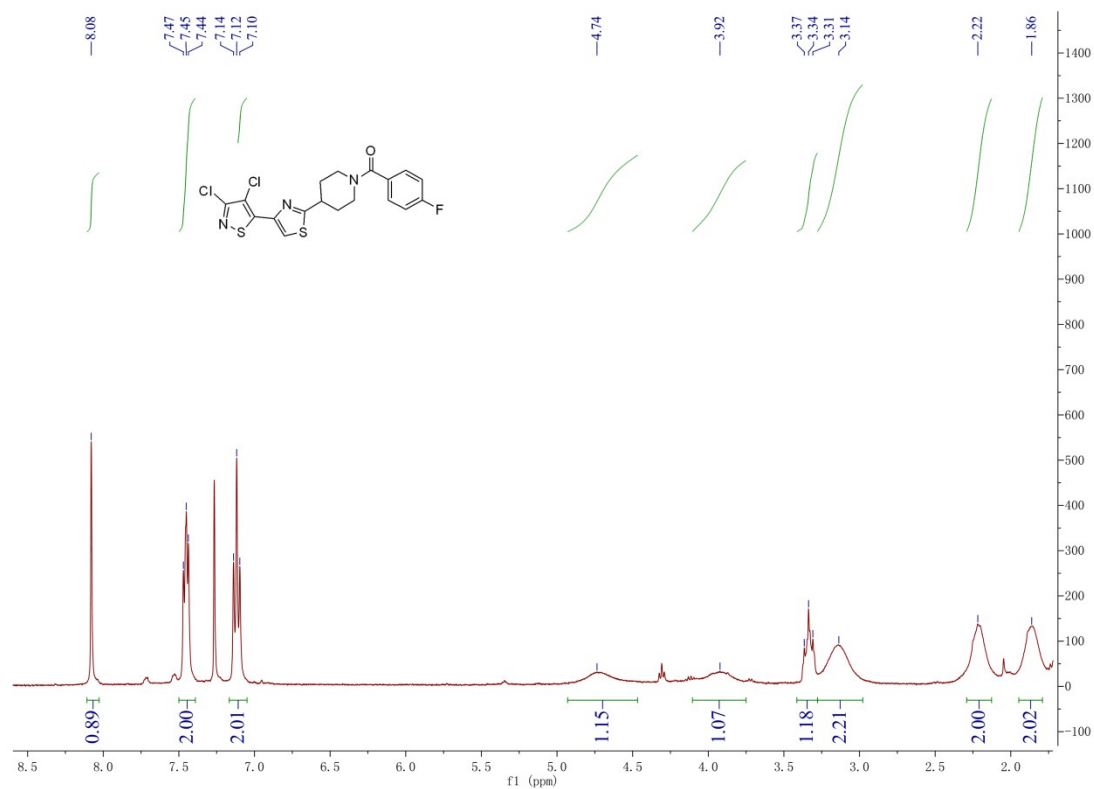

<sup>13</sup>C NMR (101 MHz, CDCl<sub>3</sub>) of compound **6q**

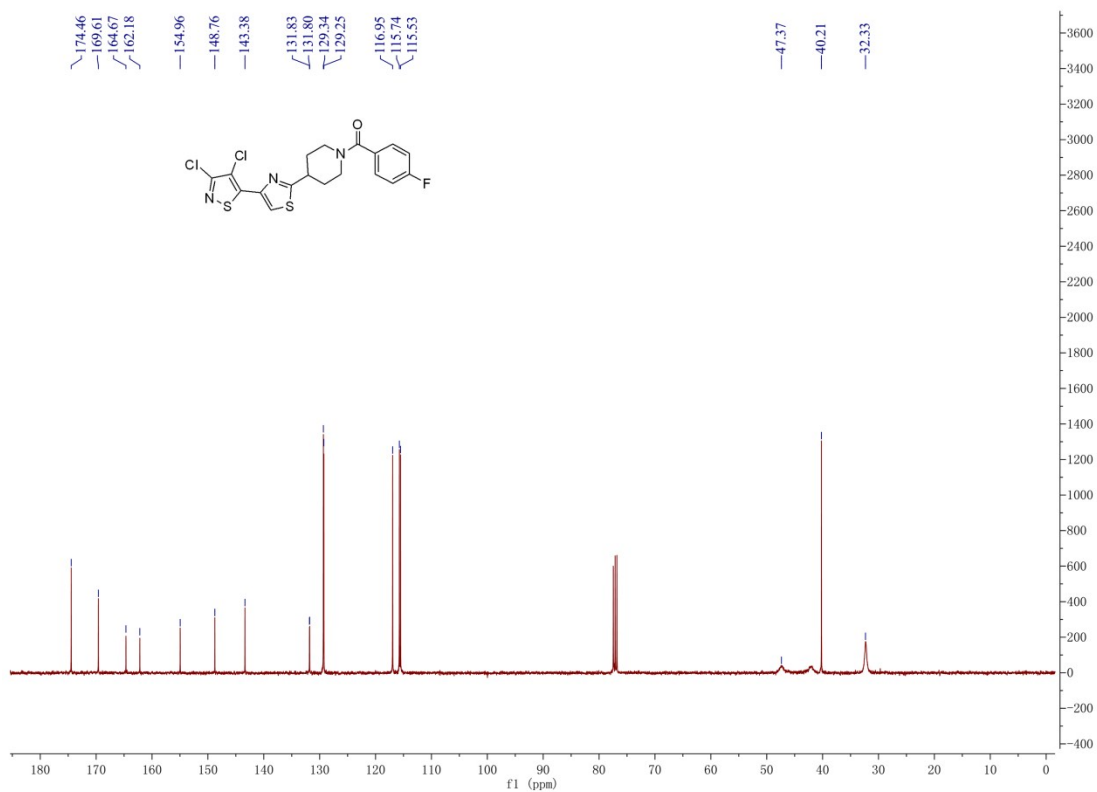



### $^1\text{H}$ NMR (400 MHz, $\text{CDCl}_3$ ) of compound **6r**

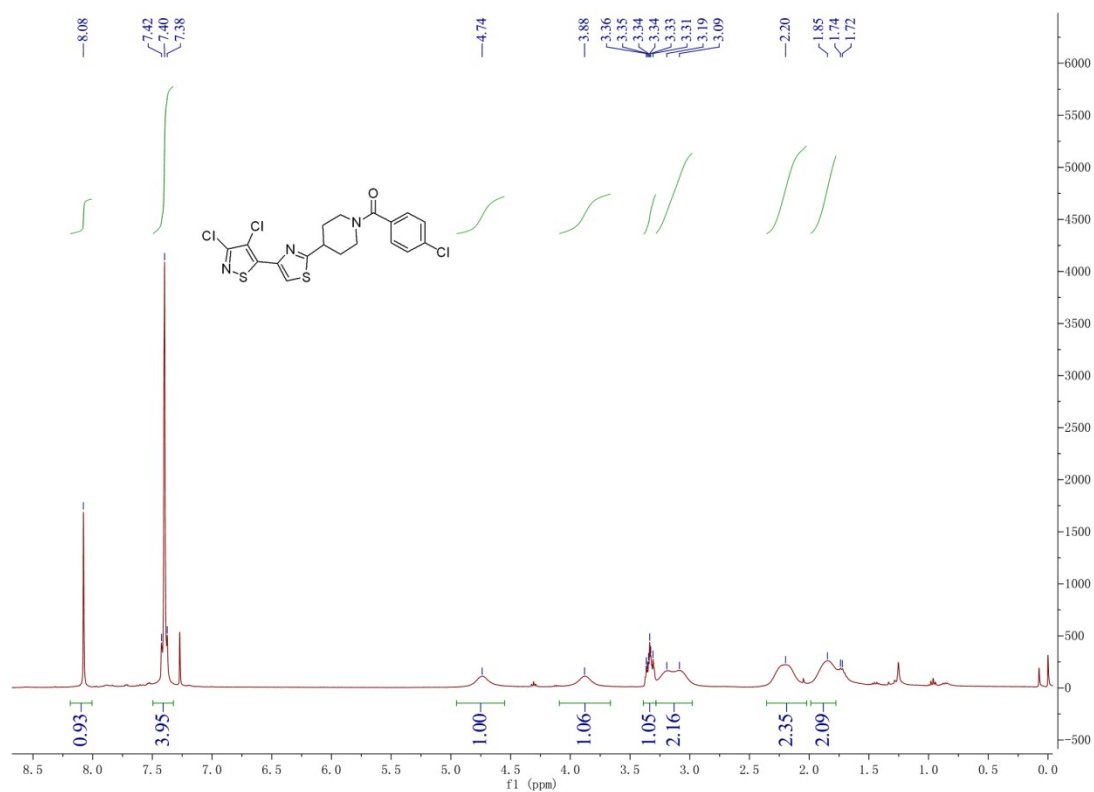

### $^{13}\text{C}$ NMR (101 MHz, $\text{CDCl}_3$ ) of compound **6r**

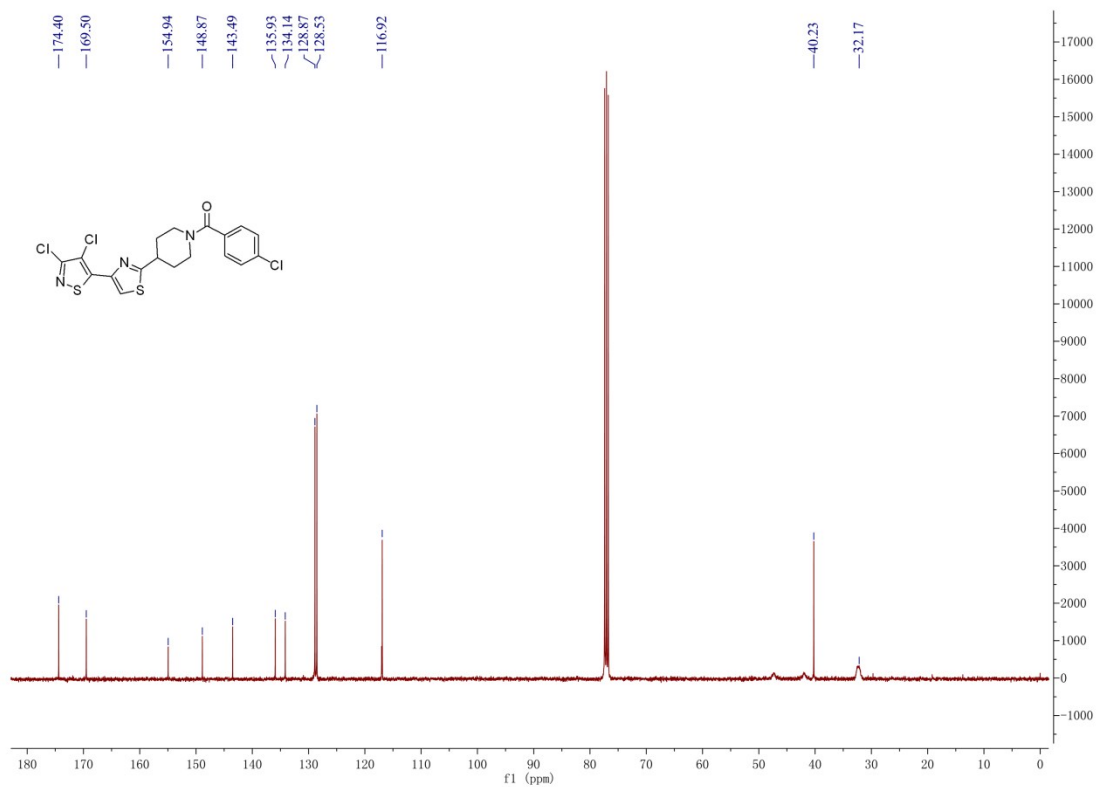

### $^1\text{H}$ NMR (400 MHz, $\text{CDCl}_3$ ) of compound **6s**

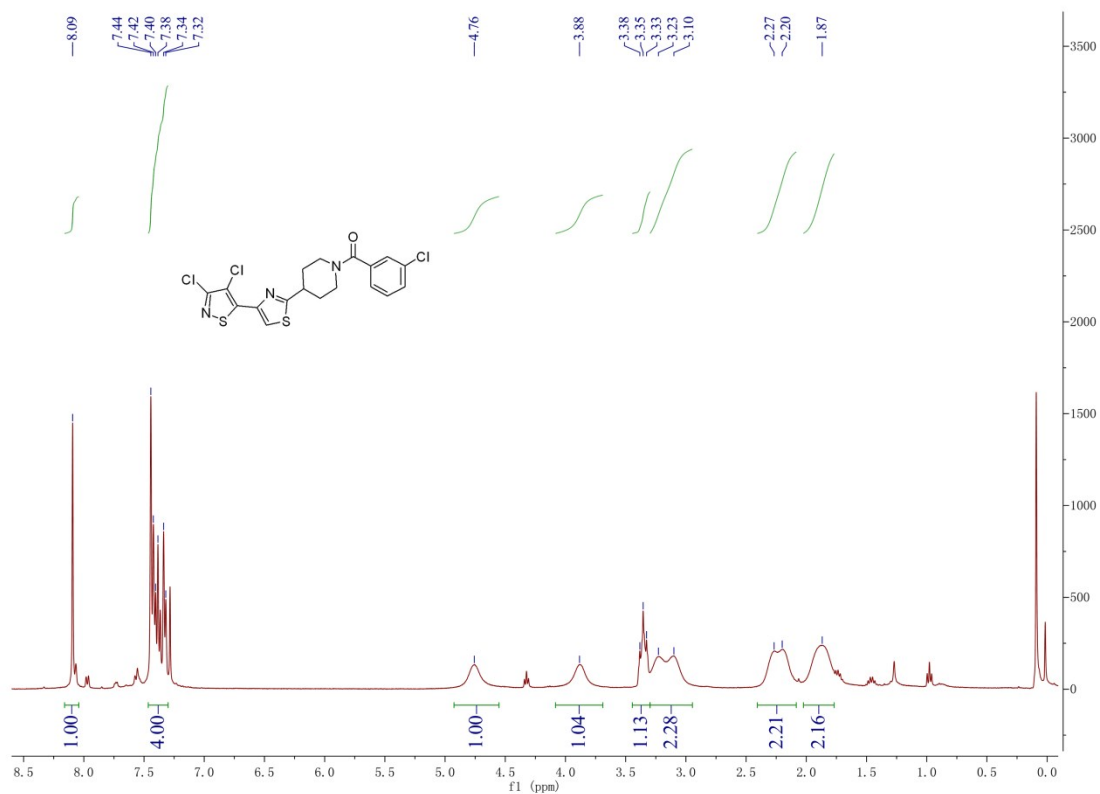

### $^{13}\text{C}$ NMR (101 MHz, $\text{CDCl}_3$ ) of compound **6s**

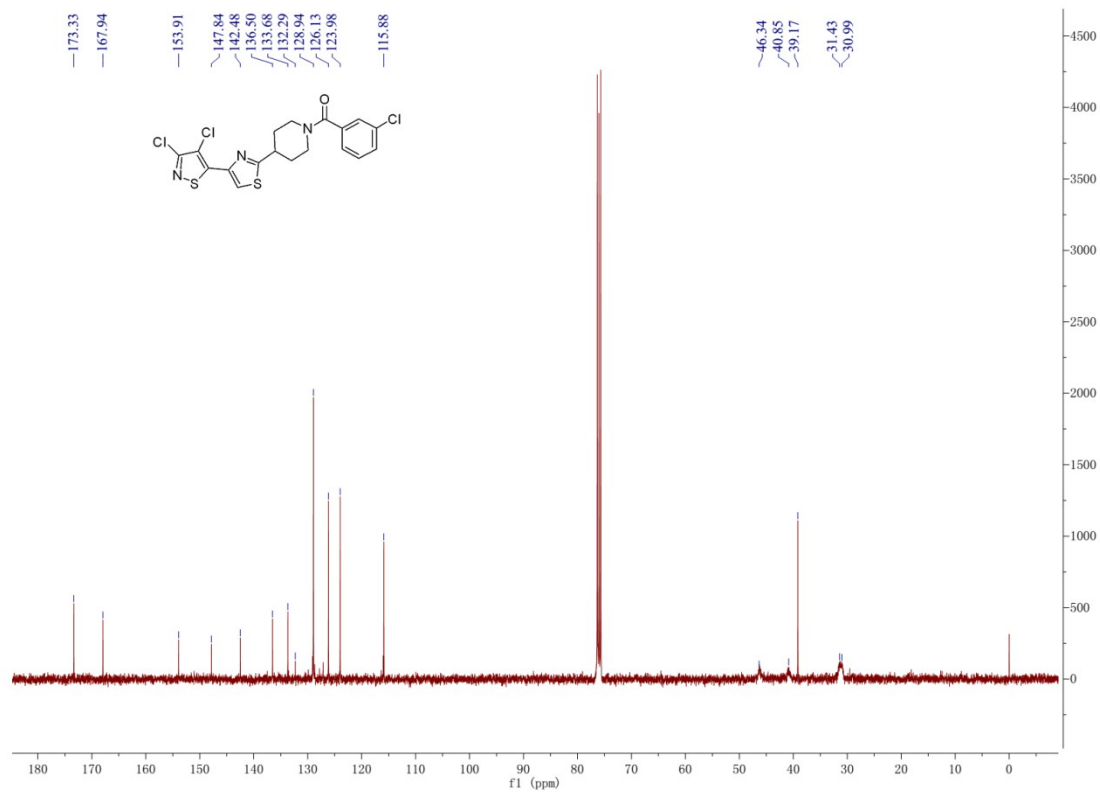

<sup>1</sup>H NMR (400 MHz, CDCl<sub>3</sub>) of compound **6t**

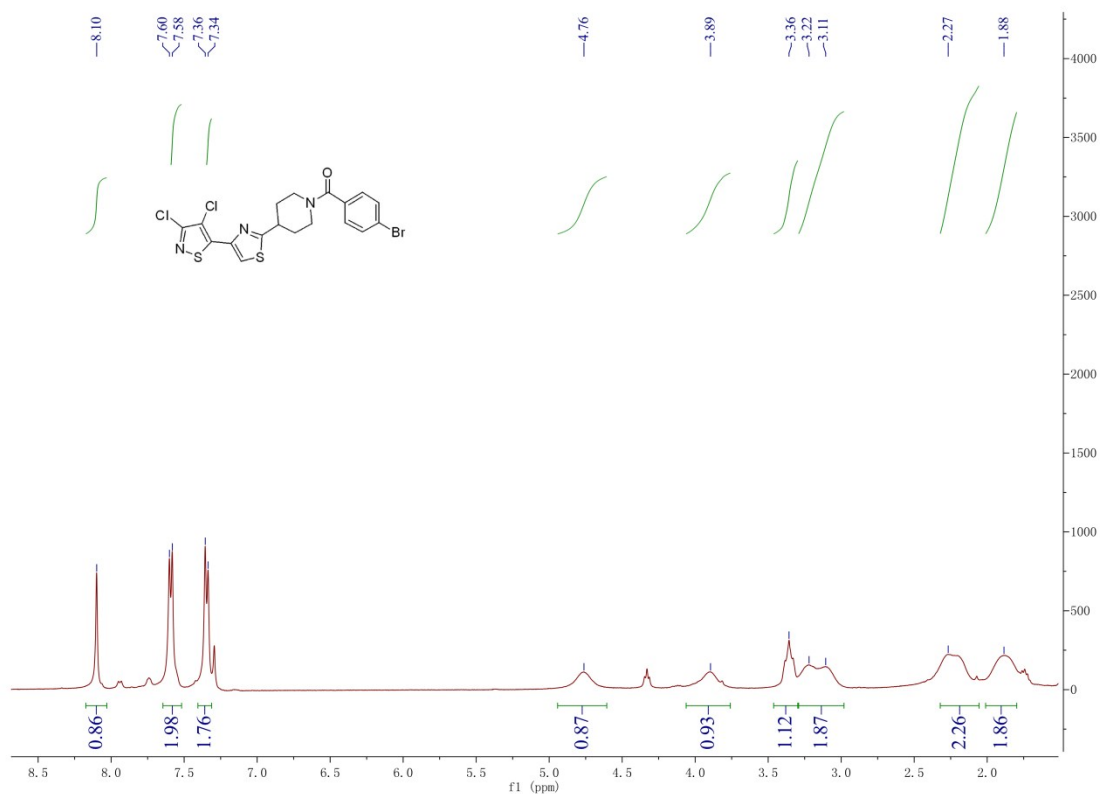

<sup>13</sup>C NMR (101 MHz, CDCl<sub>3</sub>) of compound **6t**

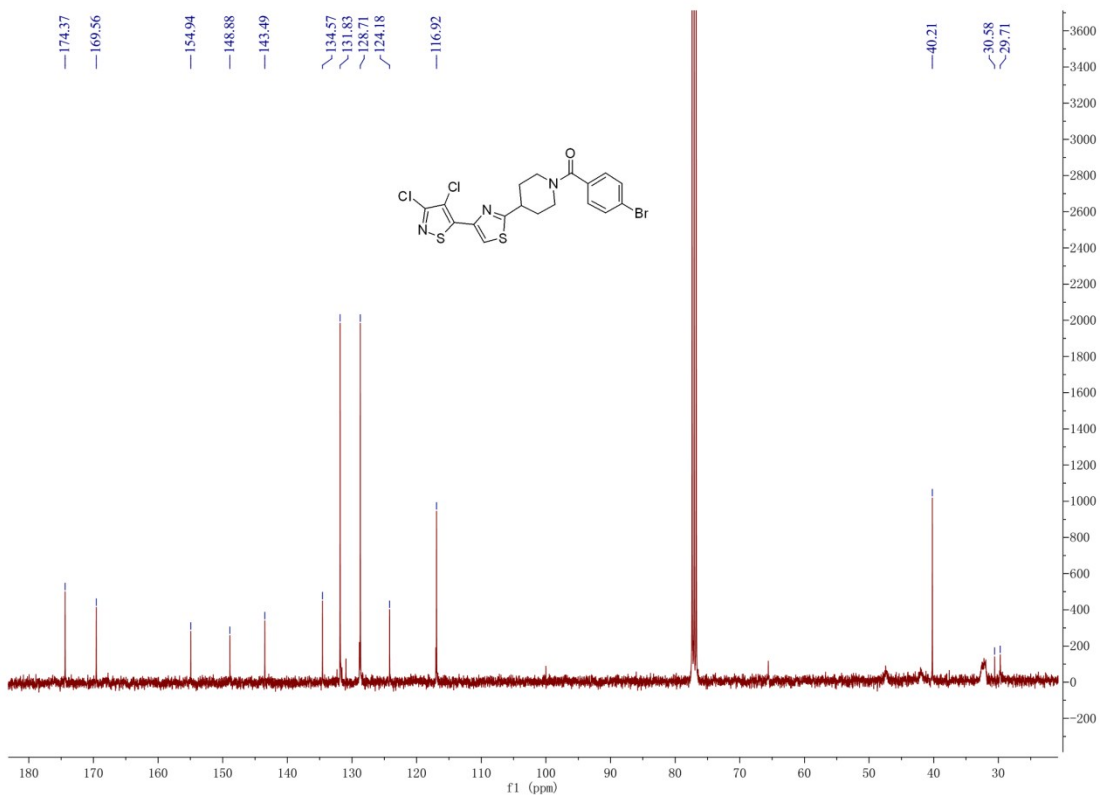

### $^1\text{H}$ NMR (400 MHz, $\text{CDCl}_3$ ) of compound **6u**

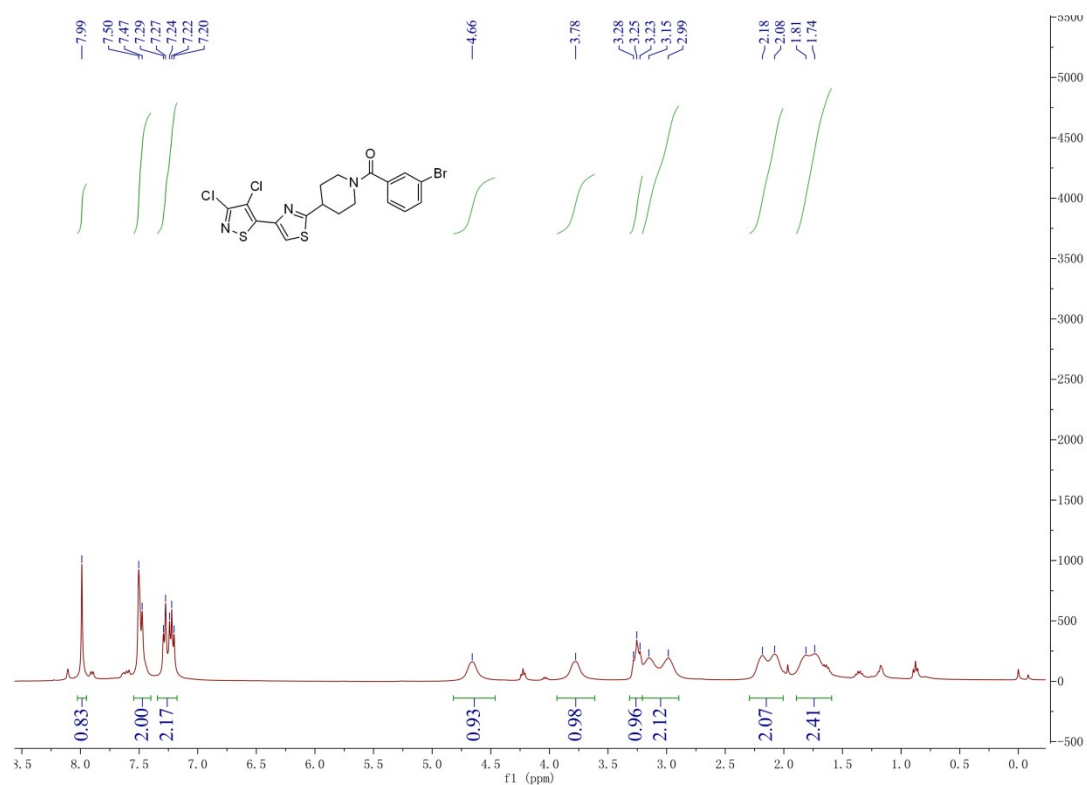

### $^{13}\text{C}$ NMR (101 MHz, $\text{CDCl}_3$ ) of compound **6u**

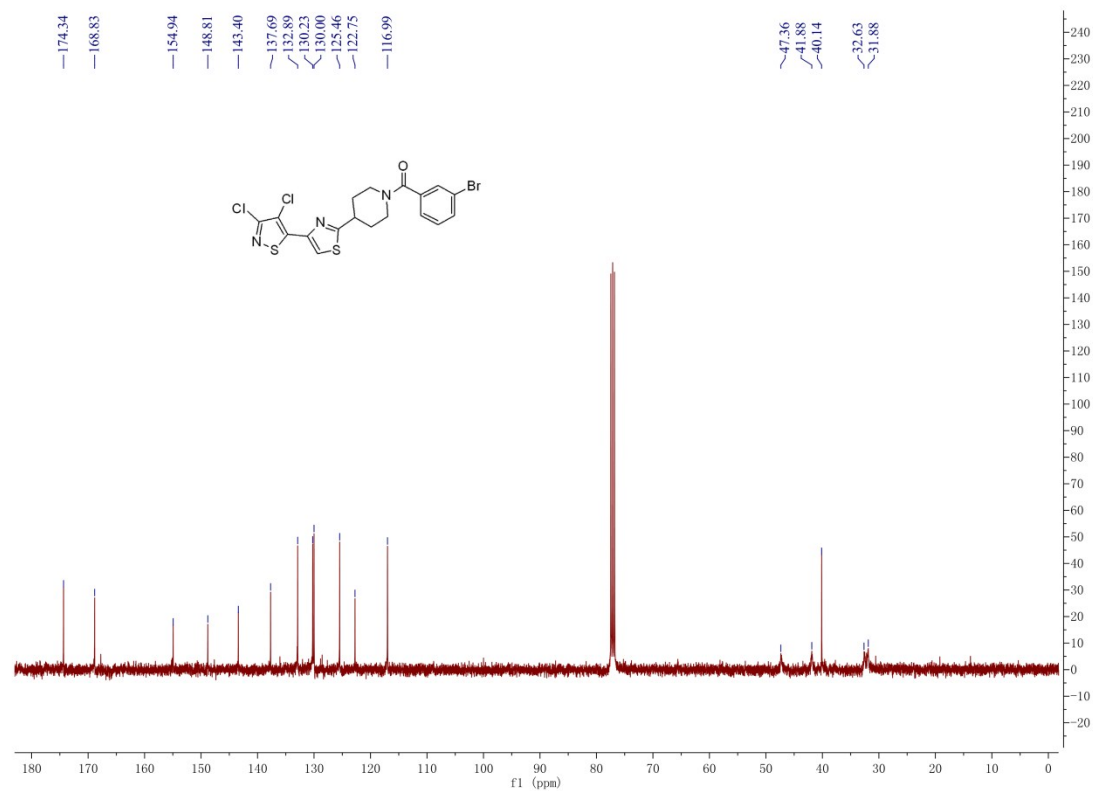

Supplement: c8ra07619g1.pdf [file c8ra07619g1.pdf]
